1 Reciprocal carbon subsidies between autotrophs and bacteria in  
2 stream food webs under stoichiometric constraints

3

4 Benoît O.L. Demars<sup>1,2</sup>, Nikolai Friberg<sup>1,3,4</sup>, Joanna L. Kemp<sup>1</sup>, Barry Thornton<sup>2</sup>

5

6 <sup>1</sup> Norwegian Institute for Water Research, Gaustaallen 21, 0349 Oslo, Norway

7 <sup>2</sup> The James Hutton Institute, Craigiebuckler, Aberdeen AB15 8QH, UK

8 <sup>3</sup> University of Copenhagen, Freshwater Biological Section, Universitetsparken 4, 3rd floor, 2100 Copenhagen,  
9 Denmark

10 <sup>4</sup> University of Leeds, water@leeds, School of Geography, Leeds LS2 9JT UK

11

12

13

14

15 Corresponding author:

16 Dr Benoît Demars, Norwegian Institute for Water Research, Gaustadalléen 21, 0349 Oslo, Norway

17 Tel.: + 47 98 227 757

18 e-mail: benoit.demars@niva.no

19

20 running title: green and brown webs intermingle

21

## 22 Summary

23 1. Soils are currently leaching out their organic matter at an increasing pace and darkening aquatic  
24 ecosystems due to climate and land use change, or recovery from acidification. The implications for  
25 stream biogeochemistry and food webs remain largely unknown, notably the metabolic balance (biotic  
26 CO<sub>2</sub> emissions), reciprocal subsidies between autotrophs and bacteria, and trophic transfer  
27 efficiencies.

28

29 2. We use a flow food web approach to test how a small addition of labile dissolved organic matter  
30 affects the strength and dynamics of the autotrophs-bacteria interaction in streams. Our paired streams  
31 whole-ecosystem experimental approach combined with continuous whole-stream metabolism and  
32 stable isotope probing allowed to unravel carbon fluxes in the control and treatment streams.

33

34 3. We increased the natural supply of dissolved organic matter for three weeks by only 12% by  
35 continuously adding 0.5 mg L<sup>-1</sup> of sucrose with a δ<sup>13</sup>C signature different from the natural organic  
36 matter. Both photosynthesis and heterotrophic respiration increased rapidly following C addition, but  
37 this was short lived due to N and P stoichiometric constraints. The resulting peak in heterotrophic  
38 respiration was of similar magnitude to natural peaks in the control observed when soils were  
39 hydrologically connected to the streams and received soil derived carbon.

40

41 4. Carbon reciprocal subsidies between autotrophs and bacteria in the control stream accounted for  
42 about 50% of net primary production and 75% of bacterial production, under low flow conditions  
43 when stream water was hydrologically disconnected from soil water. The reciprocal subsidies were  
44 weaker by 33% (autotrophs to bacteria) and 55% (bacteria to autotrophs) in the treatment relative to  
45 the control. Net primary production relied partly (11% in the control) on natural allochthonous  
46 dissolved organic carbon via the CO<sub>2</sub> produced by bacterial respiration.

47

48 5. Many large changes in ecosystem processes were observed in response to the sucrose addition. The  
49 light use efficiency of the autotrophs increased by 37%. Ecosystem respiration intensified by 70%,  
50 and the metabolic balance became relatively more negative, i.e. biotic CO<sub>2</sub> emissions increased by  
51 125%. Heterotrophic respiration and production increased by 89%, and this was reflected by a shorter  
52 (-40%) uptake length (S<sub>wOC</sub>) and faster (+92%) mineralisation velocity of organic carbon. The  
53 proportion of DOC flux respired and organic carbon use efficiency by bacteria increased by 112%.

54

55 6. Macroinvertebrate consumer density increased by 72% due to sucrose addition and consumer  
56 production was 1.8 times higher in the treatment than in the control at the end of the experiment. The  
57 trophic transfer efficiencies from resources to consumers were similar between the control and the  
58 treatment (2-5%).

59

60 7. *Synthesis*. Part of the carbon derived from natural allochthonous organic matter can feed the  
61 autotrophs via the CO<sub>2</sub> produced by stream bacterial respiration, intermingling the green and brown  
62 webs. The interaction between autotrophs and bacteria shifted from mutualism to competition with  
63 carbon addition under nutrient limitation (N, P) increasing biotic CO<sub>2</sub> emissions. Without nutrient  
64 limitation, mutualism could be reinforced by a positive feedback loop, maintaining the same biotic  
65 CO<sub>2</sub> emissions. A small increase in dissolved organic carbon supply from climate and land use change  
66 could have large effects on stream food web and biogeochemistry with implications for the global C  
67 cycle under stoichiometric constraints.

68

69

70 *Key-words*: reciprocal subsidies, microbial loop, dissolved organic matter, nutrient spiralling, whole-  
71 stream metabolism, flow food web

72

73

## 74 **Introduction**

75 The global annual riverine flux of organic C ( $0.26\text{-}0.53 \text{ Pg C year}^{-1}$ ) to the oceans is comparable to  
76 the annual C sequestration in soil ( $0.4 \text{ Pg C year}^{-1}$ ), suggesting that terrestrially derived aquatic losses  
77 of organic C may contribute to regulating changes in soil organic carbon storage (Dawson 2013).  
78 Soils are currently leaching out their organic matter at faster rates to aquatic ecosystems due to  
79 climate and land use change, or recovery from acidification (e.g. Freeman et al. 2004, Monteith et al.  
80 2007, Drake et al. 2015). The fate of this organic carbon in riverine systems remains poorly  
81 understood at the global scale, notably the degassing of  $\text{CO}_2$  back to the atmosphere (Drake et al.  
82 2018), and remains highly debated regarding its contribution to aquatic food webs (e.g. Cole 2013,  
83 Brett et al. 2017).

84

85 The bacterial processing rate of terrestrial organic matter is influenced by the strength and complexity  
86 (aromaticity) of the carbon bonds of the organic matter and C:N:P ecological stoichiometry (Mineau  
87 et al. 2016, Evans et al. 2017, Kominoski et al. 2018). Numerous labile dissolved organic carbon  
88 (DOC) additions (from trace amount to  $20 \text{ mg C L}^{-1}$ ) have repeatedly shown DOC use by bacteria and  
89 its transfer through the food chain (e.g. Warren et al. 1964, Hall 1995, Hall and Meyer 1998, Parkyn  
90 et al. 2005, Wilcox et al. 2005, Augspurger et al. 2008). Fewer studies used leaf leachate material  
91 including less labile DOC (e.g. Cummins et al. 1972, Friberg and Winterbourn 1996, Wiegner et al.  
92 2005, Wiegner et al. 2015). Many studies have also traced the flux of autochthonous DOC through to  
93 the bacteria (e.g. Lyon and Ziegler 2009, Risse-Buhl et al. 2012, Hotchkiss et al. 2014, Kuehn et al.  
94 2014).

95

96 The interactions between autotrophs and bacteria are however difficult to study (Amin et al. 2015),  
97 because primary producers, decomposers and organic matter (allochthonous and autochthonous) are  
98 intricately connected both in benthic biofilms (Kamjunke et al. 2015, Battin et al. 2016) and pelagic  
99 aggregates (Grossart 2010). In theory, bacteria and autotrophs could compete for limiting nutrients  
100 (Currie and Kalff 1984), notably when bacteria have lower C:nutrient biomass ratios than autotrophs  
101 (Daufresne and Loreau 2001). However, bacteria can have high C:nutrient ratios similar to autotrophs  
102 (Cotner et al. 2010) supporting the co-existence of autotrophs and heterotrophs (Daufresne and  
103 Loreau 2001). Correlative analyses in streams seem to support the idea that positive interactions  
104 between autotrophs and bacteria increase with nutrient (N, P) limitation (Carr et al. 2005, Scott et al.  
105 2008). Whole-stream metabolism in open streams under low flow conditions (hydrologically  
106 disconnected from catchment soils supplying allochthonous organic carbon) showed ecosystem  
107 respiration to be tightly correlated to gross primary production (Demars et al. 2016), suggesting a  
108 strong indirect mutualistic interaction between autotrophs and bacteria (Demars et al. 2011a), with  
109 autotrophs providing detritus C, N, P to bacteria and bacteria regenerating N and P by mineralisation  
110 (Cotner et al. 2010, Demars et al. 2011b), in agreement with theory (Daufresne and Loreau 2001).

111

112 The potential benefit of bacterial  $\text{CO}_2$  for primary producers has been hypothesised to explain a small  
113 increase (16-20%) in gross primary production following dissolved organic carbon addition and  
114 associated increase in bacterial activities (Robbins et al. 2017). The reciprocal carbon subsidies  
115 between autotrophs and bacteria in stream food webs has however, to our knowledge, not been  
116 studied either empirically or theoretically. It raises the possibility that the carbon of the primary  
117 producers may be partly derived from allochthonous organic matter processed by the bacteria, and  
118 intermingle the green and brown webs (Zou et al. 2016), an overlooked issue in the autochthony-  
119 allochthony debate (e.g. Cole 2013, Brett et al. 2017).

120

121 Here we test how dissolved organic carbon addition affects the strength and dynamics of the  
122 autotrophs-bacteria interaction in streams – see Figure 1. More specifically, we characterised the  
123 effect of enhancing or displacing natural DOC benthic uptake by adding a small flux of labile organic  
124 carbon (Lutz et al 2012) and estimating in-stream ecosystem C fluxes under potential stoichiometric  
125 constraints (C:N:P) using a flow food web approach (*sensu* Marcarelli et al. 2011).

126 The addition of labile organic carbon (sucrose) may reduce the mineralisation of N and P and increase  
127 allochthonous nutrient demand by bacteria, reducing nutrient availability for autotrophs. If nutrients  
128 are limiting, then C reciprocal subsidies between bacteria and autotrophs may be weakened by sucrose  
129 addition, i.e. there could be a shift between mutualism and competition. With enough nutrients the C  
130 microbial loop (to autotrophs) may be strengthened via an increase in CO<sub>2</sub> from bacterial respiration,  
131 i.e. positive feedback loop. Allochthonous nutrients may also come from allochthonous OM so  
132 bacteria may be under less nutrient constraints than algae, although the nutrient content of DOC  
133 (C:N:P=3200:103:1, Stutter et al. 2013) is generally much poorer than benthic algae  
134 (C:N:P=158:18:1, Kahlert 1998). The metabolic balance is likely to shift towards heterotrophy. A  
135 large amount of sucrose is expected to be respired, so CO<sub>2</sub> emissions are predicted to increase.  
136 Consumers and the trophic transfer efficiency should benefit from an increase in bacterial production.  
137 The design also allows to quantify the potential of priming of allochthonous OM by sucrose via  
138 bacterial activity (Kunc et al. 1976, Hotchkiss et al. 2014).

139 We combined whole-ecosystem stable isotope probing (using sucrose from sugar cane) and Bayesian  
140 mixing model to characterise the carbon links (sources to mixtures). We converted the relative carbon  
141 fluxes from the different sources, into carbon fluxes by estimating the production of the mixtures,  
142 after taking into account assimilation efficiencies (e.g. carbon use efficiency, bacterial growth  
143 efficiency). This approach relies on the integration of stream metabolism, nutrient cycling, ecological  
144 stoichiometry, stable isotope probing of the food web and production estimates (see Welti et al. 2017).  
145 In this study, we focus on the basal part of the food web, and notably on the elusive reciprocal C  
146 subsidies between autotrophs and bacteria.

147

## 148 **Methods**

### 149 *Study area*

150 We studied two heather moorland catchments with soils rich in organic carbon, within the Glensauigh  
151 research station of the James Hutton Institute in north-east Scotland (Long 2° 33' W, Lat 57° 55' N) –  
152 Fig. 2. The streams were about 0.8-1.0 m wide in the studied sections and their channels significantly  
153 undercut the banks by 30-46% of stream width. Brown trout (*Salmo trutta fario*, Salmonidae) was  
154 present in both streams. The management of the land includes regular heather burning (10-12% of  
155 surface area yearly target) for hill farming: mixed grazing of sheep and cattle. For further information  
156 see Demars (2018).

157

### 158 *The control stream*

159 The control stream (Birnie Burn) is part of the long-term monitoring of the UK Environmental  
160 Change Network (ECN, <http://data.ecn.ac.uk/>). There is a monitoring of soil temperature and moisture  
161 on the hillslope of the Birnie Burn at 275 m elevation (Cooper et al. 2007). Volumetric soil moisture  
162 content is recorded every 30 minutes at 10 and 45 cm depth, corresponding respectively to the base of  
163 the O (organic layer) and B (subsoil) horizons of the humus iron podzol present. The stream is  
164 equipped with a flume for continuous monitoring of discharge (catchment area 0.76 km<sup>2</sup>) and dip

165 water samples are collected weekly. This stream showed substantial increase in annual flow-weighted  
166 mean concentrations of stream water DOC (+0.28 mg C L<sup>-1</sup> year<sup>-1</sup> during 1994-2007, Stutter et al.  
167 2011). Water samples were analysed for DOC, pH, nutrients (N, P) and major ions. – see Cooper et al.  
168 2007, Stutter et al. 2012 and Demars 2018 for further details.

169

#### 170 *The paired stream*

171 The control stream was paired with a neighbouring stream (Cairn Burn) in 2005, also part of a long-  
172 term monitoring scheme with samples collected every week or two for stream water quality. In the  
173 late 1970s and early 80s two areas covering 33 ha were improved (reseeded, limed and fertilized) as  
174 part of sheep grazing experiments (Hill Farming Research Organisation 1983). The added facilities at  
175 the Cairn Burn (catchment area 0.9 km<sup>2</sup>) include a calibrated flume, water level, water electric  
176 conductivity, water and air temperature and barometric pressure. Data were recorded every 5 minutes  
177 (Campbell Scientific CR10x datalogger). Data logger, battery and barometric pressure were housed in  
178 a weather resistant enclosure. Photosynthetic active radiations (PAR) were also recorded in air, one  
179 metre above ground, at the same time intervals (LICOR, Lincoln, NE, USA). For more information,  
180 see Demars (2018).

181

#### 182 *Terrestrial DOC: main source of organic carbon*

183 DOC was the dominant flux of organic carbon (98%) under stable flows with average concentrations  
184 of 9.3±1.7 mg C L<sup>-1</sup> in the two studied streams (Demars 2018). This DOC was of terrestrial origin as  
185 shown by δ<sup>13</sup>C analyses of the natural DOC against terrestrial and aquatic plant material (Stutter et al.  
186 2013). The median molar C:N:P stoichiometry of the DOC was 3201:103:1, with values ranging  
187 between 978:38:1 to 12013:282:1 (Stutter et al. 2013). Chlorophyll a concentration in the water  
188 column was extremely low (< 1 µg L<sup>-1</sup>, Stutter et al. 2013). The pool of particulate organic carbon in  
189 the sediment is very small (Demars 2018), and coarse particulate organic carbon was less than 10 g C  
190 m<sup>-2</sup> (determined from Surber sampling of invertebrates, see below).

191

#### 192 *DOC addition*

193 A carboy was refilled every two days with 6 kg of sucrose dissolved in over 60 L of stream water  
194 filtered through muslin square in a large funnel. The carboy was set as a Mariotte bottle to ensure a  
195 constant dripping rate of 22 mL min<sup>-1</sup> lasting 48 hours (15 mg C s<sup>-1</sup>). The ventilation tube was netted  
196 at the top to avoid insect contamination. The dripping rate was kept constant over the 22 days of  
197 sucrose addition (23 August - 14 September) and was initially set to increase stream DOC  
198 concentration by about 0.5 mg C L<sup>-1</sup> at 30 L s<sup>-1</sup>. Sample were collected in washed bottles and filtered  
199 on-site with pre-washed filters (0.45 µm Millipore PVDF membrane filter). DOC was determined  
200 within 48 hours of collection with a Skalar San++ continuous flow analyzer (Breda, The Netherland),  
201 using potassium hydrogen phthalate as standards and sodium benzoate for quality controls. The  
202 detection limit was 0.1 mg C L<sup>-1</sup>.

203

#### 204 *Nutrient cycling studies*

205 Nutrient cycling studies were run in the control and manipulated streams before and during sucrose  
206 addition. Nutrient cycling rates were derived from continuous *in-situ* nutrient addition experiments  
207 where a conservative tracer is also included (Stream Solute Workshop 1990, Demars 2008). This



208 method tends to overestimate the nutrient uptake length  $S_w$ , average distance travelled by a nutrient  
209 molecule in the water column before river bed uptake. This is due to the addition of nutrient  
210 compared to isotopic tracer studies (e.g. Mulholland et al. 2002). However, preliminary tests in the  
211 Cairn Burn showed that the bias can be kept small (10-15%) with small nutrient additions (Demars  
212 2008). Nitrate (as  $\text{KNO}_3$ ) and phosphate (as  $\text{KH}_2\text{PO}_4$ ) were continuously added together with NaCl as  
213 conservative tracer (*cf* Schade et al. 2011). When the plateau phase was reached, water samples were  
214 collected at about 10 m interval along the reach and filtered on site (pre-washed 0.45  $\mu\text{m}$  Millipore  
215 PVDF membrane filter) (see Demars 2008). The samples were kept cool at 4-10°C. The nutrients  
216 ( $\text{PO}_4$  and  $\text{NO}_3$ ) were determined within 48 hours by colorimetry using a Skalar San++ continuous  
217 flow analyzer (Breda, The Netherland) and chloride by ion chromatography (Dionex DX600,  
218 Sunnyvale, California). The limits of detections were 0.001 for  $\text{NO}_3$  and  $\text{PO}_4$  and 0.003  $\text{mg L}^{-1}$  for Cl.  
219 In order to provide a more comparable indicator of nutrient cycling for different hydrological  
220 conditions, the uptake velocity  $v_f$  was also calculated as follows:  $v_f = uz/S_w$ , with  $u$  average water  
221 velocity and  $z$  average depth. Short uptake lengths and fast uptake velocities indicate fast cycling rates  
222 (high exchange rates between water and benthos).

223

### 224 *Whole-stream metabolism*

225 Whole-stream metabolism was estimated by the open channel two-station diel oxygen method of  
226 Odum (1956) modified by Demars et al. 2011b, 2015, 2017 and Demars (2018). Many tracer studies  
227 (using NaCl and propane) were carried out as detailed in Demars et al. (2011b) to estimate lateral  
228 inflows, mean travel time and reaeration coefficient as a function of discharge within the range of  
229 stable flows (up to 32  $\text{L s}^{-1}$ ). The relationships with discharge were very strong (Fig 3, Demars 2018)  
230 allowing accurate parameterisation of metabolism calculations under varying flow conditions as in  
231 Roberts et al. (2007) and Beaulieu et al. (2013). The high oxygen reaeration coefficient of those  
232 streams (0.05-0.24  $\text{min}^{-1}$ ) required very accurate dissolved  $\text{O}_2$  data. Oxygen concentrations were  
233 measured with optic sensors fitted on multiparameter sondes TROLL9500 Professional (In-Situ Inc.,  
234 Ft Collins, CO, USA) and Universal Controller Sc100 (Hach Lange GMBF), the latter powered with  
235 two 12 V DC (75mA) car batteries per sensor kept charged with two 20 W solar panels (SP20  
236 Campbell Scientific). The sensors were calibrated to within 1% dissolved oxygen saturation. Four  
237 sondes were deployed in the Cairn Burn at 0, 84, 138, 212 m upstream of the flume to include an extra  
238 control reach (138-212 m) upstream of the manipulated reach (0-84 m). Another two sondes were set  
239 in the control stream Birnie Burn at 88 m interval (60-148 m upstream of the ECN flume). The  
240 distances between oxygen stations corresponded to 80-90% of the oxygen sensor footprints ( $3u/k_2$ ),  
241 with  $u/k_2$  entirely independent of discharge ( $R^2=0.0005$ ), which allowed the manipulated reach to be  
242 independent of the control reach. The DOC injection point was 28 m upstream of the top station of the  
243 manipulated reach, and this distance corresponded to 69% of the oxygen sensor footprint of the top  
244 station. All sondes were deployed from May to October 2007, logging at 5 min time step interval.

245 The net metabolism was only calculated for stable flow conditions (3-32  $\text{L s}^{-1}$ ), as follows (Demars  
246 2018):

$$247 \quad NEP_t = \left( \frac{C_{AV\ t+\Delta t} - C_{AV\ t}}{\Delta t} - k_2(C_s - C_{AV\ t}) - \frac{\theta(C_g - C_{AV\ t})}{\Delta t} \right) z$$

248 with  $NEP_t$  net ecosystem production at time  $t$  ( $\text{g O}_2 \text{ m}^{-2} \text{ min}^{-1}$ ),  $C_{AV}$  average dissolved oxygen ( $\text{g O}_2 \text{ m}^{-3}$ )  
249 of the two stations at time  $t+\Delta t$  and  $t$  (min),  $\Delta t$  time interval (min),  $k_2$  oxygen exchange coefficient  
250 ( $\text{min}^{-1}$ ),  $C_s$  saturated oxygen concentration ( $\text{g O}_2 \text{ m}^{-3}$ ),  $\theta$  the proportion of lateral inflows,  $z$  average  
251 stream depth (m),  $C_g$  oxygen concentration in lateral inflows ( $\text{g O}_2 \text{ m}^{-3}$ ). The latter was calculated as  
252 follows (from baseflow analysis of stream hydrographs):

$$253 \quad C_g = (1/(1 + \exp(a \ln(Q) - b))0.9C_s) + (1 - 1/(1 + \exp(a \ln(Q) - b))0.1C_s)$$

254 with  $Q$  discharge,  $a$  and  $b$  constants, permitting to correct for baseflow (first term of the equation) and  
255 soil water (second term of the equation) lateral inflows, see Demars (2018). The proportion ( $\pm$  se) of  
256 total lateral inflows relative to discharge ( $Q_g/Q$ ) was  $10.7\pm 0.6\%$ ,  $6.6\pm 0.5\%$ , and  $2.3\pm 0.4\%$  for the  
257 Birnie Burn control, Cairn Burn control and treated reach, respectively, independently of discharge in  
258 the range  $3.8\text{--}32.5\text{ L s}^{-1}$  (stable flows).

259 All calculations were run in Excel using a preformatted spreadsheet (Demars 2018). The overall  
260 uncertainties in daily stream metabolism, including cross-calibration errors, individual parameter  
261 uncertainties, spatial heterogeneity (through the average of diel  $O_2$  curves) and correction for lateral  
262 inflows, were propagated through all the calculations using Monte Carlo simulations (Demars 2018).  
263 The corrections for lateral inflows amounted to about 6% of ER for the treated reach (Cairn Burn),  
264 19% and 16% in the control reaches, Cairn Burn and Birnie Burn, respectively.

265

### 266 *Identification of carbon sources and pathways*

267 *Macrophytes.* The percentage cover of bryophytes and filamentous green algae was measured with a  
268 ruler across transects taken every two metres along the stream reaches. Young shoots of filamentous  
269 green algae and bryophytes were collected by hand along both studied reaches before and after  
270 sucrose addition. All samples were freeze dried and milled prior to analyses for C, N,  $\delta^{13}C$  and  $\delta^{15}N$ .  
271 The main source of inorganic carbon for primary producers was assumed to be  $CO_2$  because of the  
272 low alkalinity (remaining below  $0.5\text{ meq HCO}_3\text{ L}^{-1}$  under low flows). The fractionation factor for  $CO_2$   
273 assimilation into macrophyte tissue is known to vary with  $pCO_2$  and growth rate, and was set at -  
274  $25.5\pm 3.5\%$  within the range of Rubisco forms IA and IB in the absence of carbon concentrating  
275 mechanism and transport limitation (22–29%, e.g. Raven et al. 1994, McNeven et al. 2007, Boller et  
276 al. 2015). Net primary production was assumed to be driven by filamentous green algae and biofilm  
277 autotrophs, and bryophytes were not used to calculate the flow food webs.

278

279 *Inorganic carbon.* The  $\delta^{13}C$  of dissolved  $CO_2$  is known to be variable (Findlay 2004, Billett and  
280 Garnett 2010, Billett et al. 2012). The  $\delta^{13}C$  of dissolved  $CO_2$  reflects both the signature of terrestrial C  
281 from groundwater and soil water inflows as well as in-stream processes (biotic respiration) and  $CO_2$   
282 exchange with the atmosphere ( $\delta^{13}CO_2$  about -8‰, e.g. Billett et al. 2012). In the absence of direct  
283 measurements, we considered estimating  $\delta^{13}C$  of dissolved  $CO_2$  from available data of  $\delta^{13}C$  of  
284 dissolved inorganic carbon (DIC) in the Brocky Burn, a small stream in the adjacent catchment  
285 (Waldron et al. 2007). The equilibrium method used to derive the  $\delta^{13}C$  of  $CO_2$  from the  $\delta^{13}C$  of DIC  
286 (Zhang et al. 1995) was not applicable because the time to reach the carbonate equilibrium (20–200 s)  
287 approached the average time spent by a  $CO_2$  molecule in the stream before emission in the atmosphere  
288 (300–1000 s, calculated from travel time and reaeration coefficient of  $CO_2$ , see below). The alternative  
289 evasion method (Zhang and Quay 1997) did not seem more appropriate (Billett and Garnett 2010).

290 We suggest another approach:  $\delta^{13}C$  of dissolved  $CO_2$  may be estimated indirectly under low flows  
291 using the fractionation factor of Rubisco  $-25.5\pm 3.5\%$  and  $\delta^{13}C$  of bryophytes (strict  $CO_2$  user and no  
292  $CO_2$  transport limitation). In our study, the average  $\delta^{13}C$  of bryophytes was -36.4‰, and assuming the  
293 above fractionation coefficient of -25.5‰, Glensauigh  $\delta^{13}C$  of dissolved  $CO_2$  would be -10.9‰. This  
294 is similar to the  $\delta^{13}C$  of DIC (6–14‰ under low flows, Waldron et al. 2007) and  $\delta^{13}C$  of bryophytes (-  
295 33.3‰, Palmer et al. 2001) reported for the Brocky Burn. The proof of concept comes from another  
296 Scottish stream (Dighty Burn), where Raven et al. (1994) reported the  $\delta^{13}C$  of dissolved  $CO_2$  as -  
297 14.7‰ and bryophytes as -39.2‰, suggesting a fractionation coefficient of -24.5‰ by difference. In  
298 our calculations under low flow conditions we therefore assumed  $\delta^{13}C$  of dissolved  $CO_2$  as  $-11\pm 3\%$ .

299 To quantify the reciprocal subsidies between autotrophs and bacteria, it remained to decompose the  
300 overall stable isotope signature of stream dissolved CO<sub>2</sub> into the allochthonous (groundwater, soil  
301 water and atmospheric exchange) and autochthonous (respiration by heterotrophs and autotrophs)  
302 sources. The allochthonous signature,  $\delta^{13}C_{CO_2\text{-allochthonous}}$ , can be deduced from rearranging:

$$\begin{aligned} 303 \quad F_{CO_2} \times \delta^{13}C_{CO_2} &= F_{CO_2\text{-allochthonous}} \times \delta^{13}C_{CO_2\text{-allochthonous}} \\ 304 \quad &+ F_{CO_2\text{-heterotrophs}} \times \delta^{13}C_{CO_2\text{-heterotrophs}} \\ 305 \quad &+ F_{CO_2\text{-autotrophs}} \times \delta^{13}C_{CO_2\text{-autotrophs}} \end{aligned}$$

306 where  $F_{CO_2}$  represents CO<sub>2</sub> fluxes (g C m<sup>-2</sup> day<sup>-1</sup>, with all fluxes expressed as positive values) and  $\delta^{13}C$   
307 the isotope signature (‰) of the different sources of CO<sub>2</sub>. We averaged the  $\delta^{13}C$  of the autotrophs  
308 (filamentous green algae and biofilm primary producers). The  $\delta^{13}C_{CO_2\text{-allochthonous}}$  was only calculated  
309 for the control stream under low stable flows and assumed to apply to both streams. Uncertainties  
310 were propagated in quadrature using standard deviation  $\delta x$  for sums, and relative uncertainties  $\delta x/x$  for  
311 the division.

312

313 *Sucrose*. The  $\delta^{13}C$  of sucrose from sugar cane is similar to that of dissolved CO<sub>2</sub> (-12±1‰, Jähren et  
314 al. 2006, Augspurger et al. 2008, Kankaala et al. 2010, de Castro et al. 2016), but sucrose uptake by  
315 autotrophs was assumed to be without isotopic discrimination (Wright and Hobbie 1966). The  
316 proportion of carbon derived from added sucrose ( $F_S$ ) in resources and consumers was calculated from  
317 their  $\delta^{13}C$  in the control (C) and treatment (T) reaches, before (B) and after (A) sucrose addition as  
318 follows:

$$319 \quad F_S = \frac{T_A - (T_B + (C_A - C_B))}{-12 - (T_B + (C_A - C_B))}$$

320 with all uncertainties propagated in quadrature using standard deviation  $\delta x$  for sums, and relative  
321 uncertainties  $\delta x/x$  for the division. The standard error of the mean was calculated as  $sem = \delta x/\sqrt{n}$   
322 with  $n$  average number of samples in  $C_B$ ,  $C_A$ ,  $T_B$ ,  $T_A$ .

323

324 *Allochthonous organic carbon*. The  $\delta^{13}C$  of the DOC (average ±SD) was available from a previous  
325 study from the same catchment and showed it was of terrestrial origin, i.e. not autochthonous ( $\delta^{13}C = -$   
326  $28.5 \pm 0.3$  ‰, Stutter et al. 2013, see above). Coarse particulate organic matter (CPOM) was also  
327 collected by hand along both studied reaches before and after sucrose addition. Since there was hardly  
328 any difference in  $\delta^{13}C$  between DOC and CPOM ( $\delta^{13}C = -27.4 \pm 0.7$  ‰, Table S1), we used the  $\delta^{13}C$  of  
329 CPOM determined in this study as the signature for allochthonous organic carbon.

330

331 *Periphyton*. Periphyton (or biofilm) samples represent a mixture of primary producers (algae and  
332 cyanobacteria), bacteria and fine particulate organic matter. The samples were collected before and at  
333 the end of the sucrose addition from the flumes and stones with a toothbrush, funnel and bottle. All  
334 samples were freeze dried and milled.

335 We also placed six pairs (with/without Vaseline) of unglazed ceramic tiles (10 x 10 cm) fixed on  
336 bricks and deployed along the studied reaches in both streams three weeks before the start of the  
337 manipulation. Vaseline was applied around half the tiles to prevent grazing by invertebrates. After  
338 three weeks, there was hardly any growth on the tiles, and so the tiles were left in the stream until the  
339 end of the manipulation. One brick in the control stream was lost. At the end of the experiment, the



340 tiles were frozen at -20°C, later freeze dried and the biofilm was scraped with a razor blade. Since  
341 there was little biomass per tile (about 1 g C m<sup>-2</sup>), the biofilm was pooled by stream and grazer  
342 treatments (leaving two samples per stream). Very little grazing activity was observed on the tiles  
343 during the six weeks and unsurprisingly no difference in biofilm dry mass emerged due to grazer  
344 exclusion (paired t-tests on ln transformed mass; Birnie, t<sub>4</sub>, p=0.13; Cairn, t<sub>5</sub>, p=0.26).

345 Phospholipid fatty acids (PLFAs) were extracted from the biofilm samples from the tiles and  
346 derivatised to their methyl esters (FAMES) following the procedure of Frostegård et al. (1993) using  
347 the modified extraction method of Bligh and Dyer (1959), as detailed in Certini et al. (2004).  
348 Quantification and δ<sup>13</sup>C values of the PLFAs were both determined by Gas Chromatography-  
349 Combustion-Isotope Ratio Mass Spectrometry (GC-C-IRMS) as described by Main et al. (2015), and  
350 averaged for each stream (δ<sup>13</sup>C, Table S2). Only PLFAs up to 19 carbon chain length were determined  
351 (excluding some long-chain essential polyunsaturated fatty acids, e.g. Muller-Navarra et al. 2000,  
352 Gladyshev et al. 2011).

353

354 *Bacterial carbon.* The bacterial PLFAs were identified as those most affected by sucrose addition in  
355 the treated reach and information derived from the literature (supplementary information). This also  
356 allowed to determine the δ<sup>13</sup>C of bacteria in the control reach. We used a fractionation factor of -3‰  
357 for the δ<sup>13</sup>C of bacterial fatty acids relative to bulk tissue samples (Hayes 2001, Gladyshev et al.  
358 2014). This is within the range of observed values in other studies (Boschker and Middelburg 2002,  
359 Bec et al. 2011). We used the same fractionation factor of -25.5±3.5‰ for the assimilation of CO<sub>2</sub>  
360 coming from bacterial respiration into green algal tissue. Since we only had comparative data for the  
361 treatment period, the fraction of sucrose within PLFAs was calculated as follows:

362 
$$F_s = \frac{T_A - C_A}{-12 - 3 - C_A}$$

363

364 *Biofilm autotroph carbon.* The carbon from cyanobacteria and algae were identified from a specific  
365 PLFA (α-linolenic acid, Risse-Buhl et al. 2012) using the same fractionation factor as above between  
366 PLFA and bulk tissue (Table S2).

367

368 *Macroinvertebrate consumers.* Macroinvertebrate densities were estimated from twelve to thirteen  
369 Surber samples (20 x 20 cm, mesh size 200 μm) collected randomly along the reaches (total 51  
370 samples). The samples were stored in 70% alcohol, sorted and identified. Macroinvertebrate for CN  
371 and stable isotope studies were collected by kick sampling and hand net. The animals were sorted and  
372 identified live within a day into Petri dishes and after allowing time for gut evacuation, placed in  
373 Eppendorf tubes and freeze dried. The average biomass of macroinvertebrate taxa was assessed by  
374 weighing the freeze-dried mass of all individuals within a tube divided by the number of animals. The  
375 whole macroinvertebrates were then crushed before insertion into a tin capsule.

376

377 *Carbon isotopic turnover.* Bacteria and algae were likely to be fully labelled within a week, and three  
378 weeks of sucrose addition was thought to be sufficient to label invertebrates, albeit not fully for all  
379 consumer species (especially predators), with carbon turnover ranging from about 10-35 days (Le  
380 Cren and Lowe-McConnell 1980, Hall and Meyer 1998, Collins et al. 2016 and references therein),  
381 and a time lag to reach equilibrium at each trophic level (e.g. the time for bacteria and algae to reach  
382 full equilibrium, likely to be less than a week, will delay the time grazers may reach their full  
383 equilibrium). The proportion of tissue turnover over 14 and 21 days was estimated from the consumer

384 individual body mass  $M$  (g) of the taxa (assuming freeze-dried mass = 0.2 fresh mass, Waters 1977  
385 cited in Wetzel 2001, p. 718) with tissue isotopic turnover rate  $\lambda$  ( $\text{day}^{-1}$ ) derived from the isotopic  
386 half-life study of Vander Zanden et al. (2015), general equation for invertebrates:

$$387 \quad \lambda = \frac{\ln(2)}{25.8 M^{0.23}}$$

388 and from the remaining individual body mass  $M_t$  at time  $t$ :

$$389 \quad M_t = M \exp(-\lambda t)$$

390 This provided an indication to what extent the isotopic signature of consumers may have reached an  
391 equilibrium. We used the proportion of macroinvertebrate tissue turnover over 21 days to provide the  
392 fraction of sucrose at equilibrium for individual taxa and grouped by functional feeding groups  
393 following Demars et al. (2012).

394

395 *Analytical methods.* The total carbon and total nitrogen concentrations and the  $\delta^{13}\text{C}$  and  $\delta^{15}\text{N}$  natural  
396 abundance isotope ratios of the milled samples were determined using a Flash EA 1112 Series  
397 Elemental Analyser connected via a ConFlo III to a Delta<sup>Plus</sup> XP isotope ratio mass spectrometer (all  
398 Thermo Finnigan, Bremen, Germany). The isotope ratios were traceable to reference materials  
399 USGS40 and USGS41 (both L-glutamic acid); certified both for  $\delta^{13}\text{C}$  ( $\text{‰}_{\text{VPDB}}$ ) and  $\delta^{15}\text{N}$  ( $\text{‰}_{\text{air N}_2}$ ). The  
400 carbon and nitrogen contents of the samples were calculated from the area output of the mass  
401 spectrometer calibrated against National Institute of Standards and Technology standard reference  
402 material 1547 peach leaves which was analysed with every batch of ten samples. Long term  
403 precisions for a quality control standard (milled flour) were: total carbon  $40.3 \pm 0.35 \%$ ,  $\delta^{13}\text{C}$   $-25.4 \pm$   
404  $0.13 \text{‰}$ , total nitrogen  $1.7 \pm 0.04 \%$  and  $^{15}\text{N}$   $0.367 \pm 0.0001 \text{ atom } \%$  (mean  $\pm$  sd,  $n = 200$ ). Data  
405 processing was performed using Isodat NT software version 2.0 (Thermo Electron, Bremen,  
406 Germany) and exported into Excel. Total P was determined after 30 min digestion in 50% nitric acid  
407 at  $120^\circ\text{C}$  for CPOM, bryophytes, biofilm and green filamentous algae (see Demars and Edwards  
408 2007).

409 *Data analyses.* Most studies use  $\delta^{13}\text{C}$  and  $\delta^{15}\text{N}$  to identify the flow path in the food web. Here the  
410 BACI experimental design allowed to calculate the proportion of sucrose (Fs) in all parts of the food  
411 web and was used as a tracer in addition to  $\delta^{13}\text{C}$  to determine the sources of carbon for bacteria and  
412 algae in the treatment reach after 21 days of sucrose addition. Thus, the carbon pathways were  
413 identified with carbon tracers. End member mixing analyses were used to determine the proportion of  
414 C sources and their uncertainties in primary producers and bacteria. We provided the numerical  
415 solutions given by a Bayesian stable isotope mixing model SIAR 4.2.2 (Parnell et al. 2010) in R  
416 version 3.1.3 (R Core Team 2015). The numerical solutions of SIAR were very similar to the  
417 analytical solutions of IsoError 1.04 (Phillips and Gregg 2001), and suggested the results were not  
418 biased (*cf* Brett 2014). Note, the relative importance of individual resources to consumers was outside  
419 the scope of this study.

420

#### 421 *Quantification of carbon fluxes*

422 To assess trophic transfer efficiency through the food web, our production estimates were all  
423 standardized to  $\text{g C m}^{-2} \text{ day}^{-1}$ . Respiration and photosynthesis rates in oxygen were converted to  
424 carbon using a respiratory and photosynthetic quotient of 1 (Williams and del Giorgio 2005, but see  
425 Berggren et al. 2012).

426

427 *Total CO<sub>2</sub> emissions.* In the absence of direct measurements, the excess partial pressure of CO<sub>2</sub>  
428 (EpCO<sub>2</sub>) of the streams was estimated from three measured parameters: pH, alkalinity and  
429 temperature (Neal et al. 1998, as applied in Demars et al. 2016 with atmospheric CO<sub>2</sub>=384 ppm,  
430 [ftp://ftp.cmdl.noaa.gov/ccg/co2/trends/co2\\_annmean\\_mlo.txt](ftp://ftp.cmdl.noaa.gov/ccg/co2/trends/co2_annmean_mlo.txt)). Our EpCO<sub>2</sub> estimates have high  
431 uncertainties (±50%, Demars 2018). EpCO<sub>2</sub> is the concentration of free CO<sub>2</sub> in the stream water ( $C_t$  at  
432 time  $t$ ) relative to the atmospheric equilibrium free CO<sub>2</sub> concentration ( $C_{SAT}$ ):

$$433 \quad EpCO_2 = C_t / C_{SAT}$$

434  $C_{SAT}$  was calculated from published CO<sub>2</sub> solubility in pure water at equilibrium with atmospheric CO<sub>2</sub>  
435 in the temperature range 0-90°C (Carroll et al. 1991) and Henry's law (Stumm and Morgan 1981,  
436 Butler 1982).  $C_t$  was calculated as EpCO<sub>2</sub> ×  $C_{SAT}$ . The flux of CO<sub>2</sub> ( $F_{CO_2}$ , g C m<sup>-2</sup> day<sup>-1</sup>) at the  
437 interface between water and the atmosphere was calculated as for O<sub>2</sub> following Young and Huryn  
438 (1998):

$$439 \quad F_{CO_2} = k_{CO_2} (C_{SAT} - C_t) \tau \frac{Q}{A}$$

440 with  $k_{CO_2}$  reaeration coefficient of CO<sub>2</sub> (day<sup>-1</sup>),  $C_{SAT}$  and  $C_t$  (mg C L<sup>-1</sup> or g C m<sup>-3</sup>),  $\tau$  mean travel time  
441 of the stream reach (day),  $Q$  average water discharge (m<sup>3</sup> day<sup>-1</sup>),  $A$  surface water area of the stream  
442 reach (m<sup>2</sup>). The reaeration coefficients between CO<sub>2</sub> and O<sub>2</sub> can be simply related as follows (Demars  
443 et al. 2015, Demars 2018):

$$444 \quad k_{CO_2} = \frac{Dm_{CO_2}}{Dm_{O_2}} k_{O_2} = 0.81 \pm 0.01 k_{O_2}$$

445 based on the molecular diffusivity ( $Dm$ ) of CO<sub>2</sub> and O<sub>2</sub> measured at three different temperatures  
446 within the same study (Davidson and Cullen 1957).

447 The flux of CO<sub>2</sub> was then related to discharge within the range of low stable flows for which stream  
448 metabolism was processed (Cairn n=47, R<sup>2</sup>=0.81; Birnie n=65, R<sup>2</sup>=0.77) to provide daily estimates.  
449 For more details, see Demars 2018.

450

451 *Biotic CO<sub>2</sub> emissions.* These were simply calculated as the net ecosystem production (NEP), gross  
452 primary production (GPP) plus ecosystem respiration (ER, a negative flux) expressed in g C m<sup>-2</sup> day<sup>-1</sup>.  
453 Bacterial respiration of DOC was calculated as heterotrophic respiration (HR, a negative flux) from:

$$454 \quad HR = ER + \alpha GPP \text{ with } \alpha = AR / GPP$$

455 with AR, autotrophic respiration and ER, ecosystem respiration, both negative fluxes (oxygen  
456 consumption) and GPP, positive flux (producing oxygen). We partitioned ER into auto and  
457 heterotrophic respiration with  $\alpha=0.5$  (see Demars et al. 2015) and calculated uncertainties using  $\alpha=0.2$   
458 and  $\alpha=0.8$ . Bacterial respiration of the added sucrose was calculated as the difference in heterotrophic  
459 respiration between the treatment and a control reach during sucrose addition, after standardising for  
460 site differences using the control period.

461

462 *Allochthonous organic matter.* The overall flux at the outlet of both streams was calculated as  
463 discharge times DOC concentration using the weekly data from the long-term ECN monitoring  
464 collected in 2007-2008 under low stable flows. The DOC flux was then related to discharge (Cairn  
465 n=74, R<sup>2</sup>=0.85; Birnie n=100, R<sup>2</sup>=0.83), to provide an estimate for the days for which DOC was not  
466 measured (within the same range of flows).

467 The organic carbon uptake length ( $Sw_{OC}$ , in m) and mineralisation velocity ( $v_{f-OC}$ , in  $m\ day^{-1}$ ) were  
468 calculated as in previous studies (Newbold et al. 1982, Hall et al. 2016), here neglecting POC (see  
469 above):

$$470 \quad Sw_{OC} = \frac{Q \times [DOC]}{-HR \times w}$$

471 with [DOC] dissolved organic carbon concentration ( $g\ C\ m^{-3}\ day^{-1}$ ), Q discharge ( $m^3$ ), HR  
472 heterotrophic respiration (a negative flux expressed in  $g\ C\ m^{-2}\ day^{-1}$ ) and w width (m), and

$$473 \quad v_{f-oc} = \frac{-HR}{[DOC]}$$

474

475 *Light.* We derived a conversion factor for photosynthetically active radiation (PAR;  $1\ mol\ photon\ m^{-2}$   
476  $day^{-1} = 6.13\ g\ C\ m^{-2}\ day^{-1}$ ) by relating the ratio of total quanta to total energy within the PAR  
477 spectrum ( $2.5 \times 10^{21}\ photon\ s^{-1}\ kJ^{-1} = 4.15 \times 10^{-3}\ mol\ photon\ kJ^{-1}$ ; Morel and Smith 1974) with the  
478 reciprocal of the energy content of glucose expressed in carbon units ( $15.7\ kJ\ g^{-1}\ glucose = 25.4 \times 10^{-3}$   
479  $g\ C\ kJ^{-1}$ ; Southgate and Durnin 1970).

480

481 *Sucrose.* The flux of added sucrose over the treatment reach was determined at the top of the reach  
482 (84 m upstream of the flume of Cairn Burn) using the average observed increase in DOC  
483 concentrations (28/08, 5/09, 11/09/2007) multiplied by discharge (Fig S1).

484

485 *Whole-stream production.* We calculated the net ecosystem primary production (NPP) by assuming a  
486 50% carbon use efficiency  $\epsilon$ , that is half GPP (reviewed in Demars et al. 2015, 2017) and computed  
487 NPP for  $\epsilon=0.2$  and  $\epsilon=0.8$  to provide uncertainties in our estimates. Heterotrophic production (HP,  $g\ C$   
488  $m^{-2}\ day^{-1}$ ) was calculated from heterotrophic growth efficiency HGE and heterotrophic respiration  
489 (HR, negative flux expressed in  $g\ C\ m^{-2}\ day^{-1}$ ) as follows:

$$490 \quad HP = \frac{-HR \times HGE}{1 - HGE}$$

491 Heterotrophic production was estimated for low (5%) and moderate (20%) bacterial growth  
492 efficiencies (e.g. Berggren et al. 2009, Fasching et al. 2014, Berggren and del Giorgio 2015).

493

494 *Macroinvertebrate consumers.* Secondary production was estimated from the samples collected at the  
495 end of the treatment period from the observed standing biomass ( $mg\ C\ m^{-2}$ ) of individual taxa and  
496 macroinvertebrate daily growth rate ( $day^{-1}$ ). The standing biomass was determined from the density  
497 (individuals  $m^{-2}$ ) and average individual biomass (mg C). The growth rate ( $G$ ) was determined from:

$$498 \quad G = a\ exp(bT)$$

499 with  $T$  average water temperature ( $10.5^\circ C$ ),  $a$  and  $b$  taxon specific constants derived from a global  
500 compilation of published data (Golubkov 2000, Gladyshev et al. 2016 – similarly to Morin and  
501 Dumont 1994).

502

503 *Ecosystem efficiencies*

504 With all fluxes expressed in  $\text{g C m}^{-2} \text{ day}^{-1}$ , we calculated the light use efficiency (net primary  
505 production/photosynthetic radiations), organic carbon use efficiency (bacterial production/DOC  
506 supply), resource use efficiency (consumers/ [net primary production + bacterial production]), and the  
507 proportion of biotic  $\text{CO}_2$  emissions (net ecosystem production / total  $\text{CO}_2$  emissions).

508

## 509 *Data analyses*

510 We calculated an effect size (i.e. proportional changes) of sucrose addition on our response variables  
511 (e.g. nutrient cycling, stoichiometric ratios, metabolic fluxes, ecosystem efficiencies) using the values  
512 of the control (C) and treatment (T) reaches, before (B) and after (A) sucrose addition as follows:

$$513 \quad \text{Effect size} = ((C_B - C_A) - (T_B - T_A))/T_B$$

514 with all uncertainties propagated in quadrature using standard deviation  $\delta x$  for sums, and relative  
515 uncertainties  $\delta x/x$  for the division. The standard error ( $se$ ) of the effect size was calculated as  $se =$   
516  $\delta x/\sqrt{n}$  with  $n$  average number of independent samples or measurements in  $C_B, C_A, T_B, T_A$  (although  
517 strictly speaking the samples were pseudo-replicated because the random collection was within one  
518 plot). Since the overall design was unreplicated we simply interpreted the effect size in relation to the  
519 standard error (we do not report  $p$  values).

520 The control period for the metabolic parameters and trophic transfer efficiencies was limited to the  
521 two days prior to sucrose addition (21-22 August), so the whole data series was within a single period  
522 of low stable flows, i.e. not interrupted by peak flows, producing more comparable results across  
523 sites. Daily metabolic parameters were temporally pseudo-replicated (especially during the control  
524 period), so it was only possible to report relative uncertainties ( $\delta x/x$ ).

525 All effect sizes and efficiencies were calculated at the reach scale.

526

## 527 **Results**

### 528 *DOC addition*

529 We were fortunate to have no rainfall and low stable flows during the whole three weeks of carbon  
530 addition. The target concentration was achieved at the top of the studied reach, 28 m downstream of  
531 the injection point, where the DOC addition averaged  $0.52 \text{ mg C L}^{-1}$  (Fig. S1), despite a lower than  
532 expected discharge (from  $20 \text{ L s}^{-1}$  down to  $8 \text{ L s}^{-1}$  by the end of the addition), due to significant uptake  
533 and mineralisation within the 28 m mixing zone (an average 55% loss of sucrose flux from the point  
534 of injection to the top of the reach).

535

536

### 537 *Stream metabolism continuous monitoring*

538 Bryophytes covered 4, 11 and 17% of the river bed in the Birnie control, Cairn control and Cairn  
539 treatment reach, respectively. Filamentous green algae (mostly *Microspora* sp., Microsporaceae)  
540 percentage cover increased during the period of sucrose addition from 1 to 19%, 11 to 33% and 4 to  
541 37% of channel width in the Birnie control, Cairn control and Cairn treatment reach, respectively.

542 Gross primary production (GPP) peaked to  $7.6 \text{ g O}_2 \text{ m}^{-2} \text{ day}^{-1}$  ten / eleven days after the start of  
543 sucrose addition in the treatment reach before decreasing sharply down to an average  $2.4 \text{ g O}_2 \text{ m}^{-2}$   
544  $\text{day}^{-1}$  during the last four days of the carbon addition, and this despite high photosynthetic active  
545 radiations. In contrast, GPP remained relatively constant in the control reaches Birnie Burn (about 1.2



546 g O<sub>2</sub> m<sup>-2</sup> day<sup>-1</sup>) and Cairn Burn (3.2 g O<sub>2</sub> m<sup>-2</sup> day<sup>-1</sup> for the first two weeks declining to 2.1 g O<sub>2</sub> m<sup>-2</sup>  
547 day<sup>-1</sup> during the last week g O<sub>2</sub> m<sup>-2</sup> day<sup>-1</sup>) – Fig. 4.

548 Peaks in ecosystem respiration (ER) down to -20 g O<sub>2</sub> m<sup>-2</sup> day<sup>-1</sup> (Birnie Burn) and -35 g O<sub>2</sub> m<sup>-2</sup> day<sup>-1</sup>  
549 (Cairn Burn) were more visible for the controls than the treatment reach, with respiration activity  
550 inversely related to soil hydrological connectivity, as recorded by soil moisture continuous monitoring  
551 (Fig. 4). There was an increase in ER in the treatment reach at the start of the sucrose addition, despite  
552 the continuing loss of hydrological connectivity. More specifically, heterotrophic respiration activity  
553 associated to sucrose addition peaked sharply 15 days after the start of the addition, processing up to  
554 59% of the daily sucrose flux (Fig. 5). On average 35±20% of the added sucrose was respired during  
555 the addition over just 84 m (or 15 minutes mean travel time). Heterotrophic production ranged  
556 between 2% and 10% of the sucrose flux, based on bacterial growth efficiencies of 0.05 and 0.2  
557 respectively.

558

559

560

### 561 *Nutrient cycling studies and stoichiometry*

562 The background concentrations of nitrate and phosphate were 180 and 90 µg N L<sup>-1</sup> and 2 and 4 µg P  
563 L<sup>-1</sup> in the Birnie control and Cairn treatment reach, respectively. The added geometric mean of N and  
564 P were on average 471 µg N L<sup>-1</sup> and 24 µg P L<sup>-1</sup>. The addition of sucrose had no effect on nitrate and  
565 phosphate nutrient uptake length and uptake velocity (Fig. 6, Table S3). The phosphate uptake length  
566 was highly related to discharge and became very short, down to 31 m in the treatment reach towards  
567 the end of the sucrose addition. Phosphate uptake velocity was about 0.2 mm s<sup>-1</sup> and an order of  
568 magnitude faster than nitrate with uptake lengths in the kilometre range.

569 The molar C:N:P stoichiometric ratios of coarse particulate organic matter and bryophytes remained  
570 stable throughout the experiment. Sucrose addition exerted strong effects on filamentous green algae  
571 and periphyton stoichiometry (Fig. 7, Table S4). While the molar C:N:P stoichiometric ratios  
572 decreased in the control stream, they increased sharply in the treatment reach following sucrose  
573 addition: from 330:29:1 to 632:49:1 in filamentous green algae and from 262:29:1 to 428:38:1 in  
574 periphyton.

575

576

### 577 *Fate of added sucrose*

578 The fraction of carbon derived from sucrose (F<sub>S</sub>) among the food web resources filamentous green  
579 algae, periphyton and its autotrophs and heterotrophs (bacteria) was relatively high at 24, 23, 36 and  
580 68%, respectively (Fig. 8, Table S1). The average (range) tissue turnover of consumers was 76% (53-  
581 92%) to 88% (67-98%) over 14 to 21 days. The proportion of carbon derived from sucrose in  
582 macroinvertebrates, after correcting for tissue turnover, varied among taxa but averaged around 23%  
583 independently of the functional groups, except for filter feeders with F<sub>S</sub>=64% (Fig. 9, Table S5).

584

### 585 *Identification of carbon sources and pathways under low flows (end of experiment)*

586 The autotrophs (filamentous green algae and periphyton autotrophs) derived 54±11% of their CO<sub>2</sub>  
587 from allochthonous sources (groundwater and atmosphere) and 46±11% from bacteria in the control  
588 reach. In the treatment reach, autotrophs derived a similar proportion of CO<sub>2</sub> from allochthonous  
589 sources (59±9%), some osmotrophic uptake of sucrose (10±7%), and relatively less from bacteria  
590 (31±11%). The bacteria used mostly autotrophic carbon (76±12%) relative to allochthonous organic  
591 carbon (24±12%) in the control, but preferred sucrose (51±7%) to autotrophic (34±12) and  
592 allochthonous organic matter (15±12%) in the treatment reach – see Fig. S2.

593

594 *Quantification of carbon fluxes and efficiencies*

595 The flow food web of the control and treatment reach over the three weeks of sucrose addition were  
596 quantified according to our conceptual model (see Fig. 1). Figure 10 illustrates the C fluxes of net  
597 primary production, bacterial production and secondary production as well as bacterial CO<sub>2</sub> flux and  
598 overall net ecosystem production (emission of CO<sub>2</sub> to the atmosphere). Photosynthetic active radiation  
599 (light) decreased slightly from 106 to 80 and 118 to 90 g C m<sup>-2</sup> day<sup>-1</sup> in the control and treatment  
600 respectively. Allochthonous organic matter (DOC) was more than halved from 177 to 85 and 110 to  
601 50 g C m<sup>-2</sup> day<sup>-1</sup> in the control and treatment. This was reflected by a general reduction in the organic  
602 carbon uptake length 3214 to 2531 m and 4257 to 1886 m in the control and treatment, respectively,  
603 independently of the carbon addition. The organic carbon uptake velocity decreased in the control  
604 from 0.82 to 0.55 m day<sup>-1</sup> but increased in the treatment from 0.53 to 0.76 m day<sup>-1</sup>.

605

606 Our estimates suggest that a large part of net primary production (0.23, range 0.09-0.38 g C m<sup>-2</sup> day<sup>-1</sup>)  
607 was used for bacterial production (0.15-0.69 g C m<sup>-2</sup> day<sup>-1</sup>) in the control, and in turn nearly half of  
608 the CO<sub>2</sub> fixed by autotrophs was derived from bacterial CO<sub>2</sub>, although it represented a small fraction  
609 of bacterial respiration driving net ecosystem production (biotic CO<sub>2</sub> emissions). These reciprocal C  
610 subsidies between autotrophs and bacteria were not as strong relative to net primary production (0.91,  
611 range 0.36-1.46 g C m<sup>-2</sup> day<sup>-1</sup>) and bacterial production (0.14-0.66 g C m<sup>-2</sup> day<sup>-1</sup>) in the treatment  
612 during sucrose addition. The estimated flux of allochthonous organic matter assimilated by bacteria  
613 was similar in the control (0.04-0.17 g C m<sup>-2</sup> day<sup>-1</sup>) and treatment (0.02-0.10 g C m<sup>-2</sup> day<sup>-1</sup>). Part of the  
614 allochthonous organic matter respired by bacteria was recycled by primary producers and accounted  
615 for 11±6% of net primary production in the control.

616

617 We also derived, from the BACI design, the effect size of sucrose addition on selected whole-  
618 ecosystem metabolic properties and efficiencies (see Fig. 11, Table S6). All estimated ecosystem  
619 properties and efficiencies were summarised in Table S7 for Birnie control and Cairn treatment before  
620 and after sucrose addition. We present some key highlights below.

621

622 While GPP increased marginally (12%), there was a small relative increase in light use efficiency  
623 (37%). ER intensified by 70%, and the net ecosystem production (NEP) became relatively more  
624 negative by 125%, i.e. 125% relative increase in biotic CO<sub>2</sub> emissions. Heterotrophic respiration and  
625 production increased by 89%, and this was reflected by a shorter (-40%) uptake length (Sw<sub>OC</sub>) and  
626 faster mineralisation velocity (92%) of organic carbon. The proportion of DOC flux respired (range  
627 2.2-5.3%) and organic carbon use efficiency by bacteria (range 0.1-0.3%) increased by 112%. While  
628 there was a relative decrease (-20%) in total CO<sub>2</sub> emissions, the proportion of biotic CO<sub>2</sub> emission  
629 increased by 88%. The reciprocal subsidies between autotrophs and bacteria were weaker by 33%  
630 (autotrophs to bacteria) and 55% (bacteria to autotrophs) in the treatment relative to the control.

631

632 The average consumer biomass per individual was similar between the control (0.20 mg C ind<sup>-1</sup>) and  
633 the treatment reach (0.21 mg C ind<sup>-1</sup>) and average production per individual was slightly higher in the  
634 treatment reach (6 µg C ind<sup>-1</sup> day<sup>-1</sup>) than in the control (5 µg C ind<sup>-1</sup> day<sup>-1</sup>), at the end of the sucrose  
635 addition. Consumer density (range 1300-6000 ind m<sup>-2</sup>) increased by 72% due to sucrose addition and  
636 consumer production was higher in the treatment (36 mg C m<sup>-2</sup> day<sup>-1</sup>) than in the control (20 mg C m<sup>-2</sup>  
637 day<sup>-1</sup>) at the end of the experiment. The resource use efficiency (trophic transfer efficiency) by  
638 consumers was similar between the control and the treatment reach (2-5%), with a size effect of  
639 sucrose addition ranging from -33% to +8% depending on the heterotrophic growth efficiency (0.05  
640 and 0.2, respectively) used to calculate heterotrophic production.

641

642

## 643 Discussion

644

645 Our experiment showed that a small continuous addition of labile DOC (0.52 mg C L<sup>-1</sup> as sucrose,  
646 12% of total DOC, Fig. S1) can profoundly alter whole-ecosystem behaviour. The use of a before and  
647 after control experiment together with the addition of a deliberate tracer with a distinctive  $\delta^{13}\text{C}$   
648 signature allowed not only to trace the fate of the added carbon into the treated reach but also to build  
649 the flow food web of the control reach, unravel C reciprocal subsidies between autotrophs and  
650 bacteria, and demonstrate the potential for some natural allochthonous organic matter to feed the  
651 primary producers via bacterial respiration.

652

653

### 654 *Reciprocal subsidies between autotrophs and bacteria*

655 The use of autotroph carbon by bacteria has been shown before using a photosystem II inhibitor in  
656 biofilm (Neely and Wetzel 1995) or  $\delta^{13}\text{C}_{\text{DIC}}$  additions (e.g. Lyon and Ziegler 2009, Risse-Buhl et al.  
657 2012, Kuehn et al. 2014, Hotchkiss and Hall 2015). The degradation of natural DOC by bacteria has  
658 been inferred from bacterial respiration (e.g. Cory et al. 2014, Mineau et al. 2016, Demars 2018), and  
659 many bacterial production estimates have been published (e.g. Fischer and Pusch 2001, Fukuda et al.  
660 2006). The interaction strength between autotrophs and bacteria has been inferred statistically along  
661 nutrient gradients (e.g. Carr et al. 2005, Scott et al. 2008), but this is the first study, to our knowledge,  
662 quantifying the reciprocal carbon subsidies between autotrophs and bacteria in streams, notably  
663 bacterial CO<sub>2</sub> use by autotrophs. This recycling of CO<sub>2</sub> in turbulent headwater streams is possible  
664 within the intricate matrix of the biofilm (e.g. Kamjunke et al. 2015, Battin et al. 2016) or an algal  
665 mat, as when the CO<sub>2</sub> is released in the water column it is very quickly degassed to the atmosphere  
666 (here 5-15 min, Demars 2018). It is important to note that the reciprocal carbon subsidies were  
667 identified under low flow conditions when stream water was hydrologically disconnected from soil  
668 water. When the soils are hydrologically connected to the stream water, and supply high fluxes of  
669 DOC, bacterial respiration and production was shown to be virtually independent of primary  
670 production (Demars 2018).

671

672 Our flow food web under low flows (end of experiment) suggested a strong microbial loop (to  
673 autotrophs) in the control stream, as expected at the low end of the nutrient gradient (Scott et al. 2008,  
674 Lyon and Ziegler 2009). The addition of labile DOC weakened this microbial loop, as indicated by  
675 the difference in reciprocal subsidies between algae and bacteria in the control and treatment (Fig. 10,  
676 11), as predicted under nutrient limitation (Fig. 1). Bacterial production in the treatment reach relied  
677 more on sucrose than autotrophs and allochthonous organic matter, assuming a similar bacterial  
678 growth efficiency for all sources (range 5-20%), which is plausible under nutrient limitation (del  
679 Giorgio and Cole 1998) and corresponded to previous studies (e.g. Berggren et al. 2009, Fasching et  
680 al. 2014, Berggren and del Giorgio 2015).

681 The bacterial CO<sub>2</sub> flux to autotrophs assumed its  $\delta^{13}\text{C}$  signature was the same as that of the bacteria,  
682 but the proportion of C sources used in bacterial production may be different to the proportion of C  
683 sources respired by bacteria. The controlled experiment allowed to calculate the bacterial respiration  
684 of the added sucrose as 2.16 g C m<sup>-2</sup> day<sup>-1</sup> over the three weeks of sucrose addition. This represented  
685 82% (53-184%) of the estimated treatment bacterial respiration (2.64 ± 1.45 g C m<sup>-2</sup> day<sup>-1</sup>, Table S7)  
686 and the proportion of sucrose in bacteria was estimated at 51 ± 7 % (Fig. S2). So the estimates were  
687 still within measurement errors.

688

689 The autotrophs did not include bryophytes in our flow food web calculations because their  
690 contribution to primary production was thought to be negligible over the few weeks of the

691 experiment, and particularly towards the end of the experiment (on which data the flow food webs  
692 were based) when filamentous green algae were covering bryophytes. The lack of bryophyte growth  
693 under very low phosphorus concentrations (here 2-4  $\mu\text{g P L}^{-1}$  of soluble reactive P) combined with  
694 shading by epiphytes has been well documented (e.g. Finlay and Bowden 1994). This may also  
695 explain the lack of changes in bryophyte C:N:P stoichiometry (Fig. 7).

696

697

#### 698 *Boom and bust: role of nutrients*

699 Gross primary productivity (GPP) appeared to be stimulated by the addition of sucrose but this was  
700 short lived, despite sustained light availability during the addition period (Fig. 4). Heterotrophic  
701 respiration of sucrose peaked after two weeks (three days after GPP) but crashed within days while  
702 the supply of sucrose was continuously flowing through the reach (with sucrose concentration  
703 increasing from 0.22 to 0.88  $\text{mg C L}^{-1}$  with falling discharge). This was in sharp contrast to the peaks  
704 in respiration followed by a more sustained response of ecosystem (mostly heterotrophic) respiration  
705 to hydrological connectivity with soil water in the control reaches (Fig. 4, see Demars 2018). This  
706 boom and bust in the treated reach was likely due to nutrient limitation, mostly P according to the  
707 changes in filamentous green algae and periphyton C:N:P stoichiometry. Surprisingly, the shortfall of  
708 nutrients (N, P) was not compensated by faster nutrient cycling rates, as observed in previous studies  
709 with much higher labile DOC additions (e.g. Bernhardt and Likens 2002). This may be due to  
710 limitation of phosphate uptake by  $\text{NH}_4$  availability (long term median in both streams 7  $\mu\text{g N L}^{-1}$ ) in  
711 streams relatively rich in nitrate (see Oviedo-Vargas et al. 2013). The higher primary productivity in  
712 the Cairn burn may partly result from higher P availability (4  $\mu\text{g P L}^{-1}$ ) than in the control Birnie Burn  
713 (2  $\mu\text{g P L}^{-1}$ ), despite lower nitrate availability (90  $\mu\text{g N L}^{-1}$  versus 180  $\mu\text{g N L}^{-1}$ , respectively) – Table  
714 S3. These different nutrient supply rates may reflect the legacy of past experimental amendments (Ca,  
715 N, P, K) in 33 ha of the Cairn burn catchment aimed to increase grassland productivity in the late  
716 1970s and early 1980s (Hill Farming Research Organisation 1983).

717

718

#### 719 *Metabolic balance*

720 The metabolic balance (or net ecosystem production) was responsible for a quarter of  $\text{CO}_2$  emissions  
721 in the control and increased from 6 to 12 % in the treatment reach during sucrose addition.  $\text{CO}_2$   
722 emissions from these streams were therefore largely dominated by soil  $\text{CO}_2$  derived from the  
723 mineralisation of soil organic matter, rather than rock weathering of Dalradian acid schist drifts  
724 (Demars 2018). The proportion of in-stream biotic emissions were comparable to continental scale  
725 studies (<14% in African rivers, Borges et al. 2015; 28% in north American rivers, Hotchkiss et al.  
726 2015). It is important to note that ecosystem photosynthesis and community respiration can be  
727 decoupled at individual sites in long term studies with temporal changes in C supply (e.g. Roberts et  
728 al. 2007, Beaulieu et al. 2013, Demars 2018). Under summer low flows respiration activity is more  
729 constrained by gross primary production explaining the strong interaction between photosynthesis and  
730 respiration (e.g. Demars et al. 2016).

731

732

#### 733 *Fate of carbon*

734 Sucrose is very labile and is well known to promote the growth of filamentous bacteria *Sphaerotilus*  
735 *natans* (“sewage fungus”), even at relatively low concentrations (0.25-1.00  $\text{mg L}^{-1}$ ) in a stable flow  
736 forested stream (Warren et al. 1964). This was not observed in this study, likely because the moorland  
737 streams studied here were more open and colonised by *Microspora*, a common genus of filamentous  
738 green algae in Scottish streams (Kinross et al. 1993). *Microspora* was able to uptake sucrose by  
739 osmotrophy (Wright and Hobbie 1966) but this accounted to only 10% of C uptake by *Microspora*.  
740 Overall daily uptake of sucrose by autotrophs represented 1.2% of the average daily flux of sucrose.



741  
742  
743  
744  
745  
746  
747  
748  
749  
750  
751  
752  
753  
754  
755  
756  
757  
758  
759  
760  
761  
762  
763  
764  
765  
766  
767  
768  
769  
770  
771  
772  
773  
774  
775  
776  
777  
778  
779  
780  
781  
782  
783  
784  
785  
786  
787  
788  
789  
790  
791

The proportion of added labile carbon (sucrose) in the consumers varied widely between species (Table S5), as observed in previous studies (e.g. Hall 1995, Hall and Meyer 1998, Collins et al. 2016), but not across functional feeding groups (19-27%), except for filter feeders (64%). This is questioning the usefulness of functional feeding groups, as defined here, to construct food webs. Filter feeders and notably blackflies (Simuliidae) have been shown to directly assimilate DOC, extracellular polysaccharides and colloidal particles (Couch et al. 1996, Hershey et al. 1996, Ciborowski et al. 1997, Wotton 2009). This can explain the high proportion of added sucrose in blackflies (81%). Since the densities of blackflies were low (average 88-231 individuals m<sup>-2</sup>), C flux from direct uptake by consumers (filter feeders) were extremely small. The mass of sugar retained by all consumers was only 292 ±107 mg C m<sup>-2</sup>, or about 25 g C for the treated stream reach, representing 0.2% of the sucrose flux over the three-week addition.

The treatment reach did not show the large peaks in respiration (outside the period of sucrose addition) that the control reaches showed when the catchment was hydrologically connected, as indicated by soil moisture (Fig. 4, Demars 2018). This is likely because the treatment reach is a more constrained reach largely disconnected from the land. It was initially chosen to avoid lateral inflows which were very small (2.3%) and mostly from a spring fed flush (i.e. groundwater), rather than seepage from organic and riparian soils known to stimulate bacterial activity (e.g. Brunke and Gonsler 1997, Pusch et al. 1998). Interestingly the average bacterial respiration was similar in the control and treatment reaches over the three weeks of sucrose addition (Fig. 10), suggesting part of the organic matter respired in the control was relatively labile and comparable to the 0.5 mg C L<sup>-1</sup> of added sucrose. The dynamic of this respiration within the three weeks was very different however, decreasing with the progressive loss of hydrological connectivity with soils in the control, and peaking after two weeks in the treatment (Fig. 4).

By and far, the largest quantity of carbon processed by bacteria was lost as CO<sub>2</sub> emission. Heterotrophic respiration over the treated reach respired (on average) 35% of the added sucrose. Bacterial production averaged 2-10% of the sucrose flux. Heterotrophic respiration of natural allochthonous DOC was about 3% in the control stream and 2.2 % prior to sucrose addition in the treatment. The fact that sucrose was processed 10 times faster than natural DOC was well reflected by the shortening of the organic uptake length ( $S_{wOC}$ ) and increased mineralisation velocity ( $v_fOC$ ). This was not surprising (see e.g. Marcarelli et al. 2011, Mineau et al. 2016), but the rate of mineralisation of natural DOC was relatively high and, scaled up to the first order catchment, represented 23±11% of the annual DOC flux in the control reach of the Cairn burn (Demars 2018). The changes in organic uptake lengths in the control and the differences between control and treatment prior to sucrose addition can be explained by the loss of hydrological connectivity with soil water, as indicated by the changes in soil moisture, and the difference in lateral inflows between the control (10.7%) and the treatment (2.3%). The shortening of the organic uptake length ( $S_{wOC}$ ) reflected more hydrological changes as indicated by the different direction of change in organic carbon uptake ( $v_fOC$ ) between the control and the treatment. In the control  $v_fOC$  declined by 32% against a 52% decline in DOC supply. In contrast,  $v_fOC$  increased by 43% in the treatment with the addition of labile carbon, despite a 55% fall in DOC supply (similar to the control). Overall the uptake lengths of natural DOC (i.e. excluding those influenced by sucrose addition) were longer (2.5-4.3 km) than the length of the first order streams studied here (1 km), and so a large part of the carbon is released to downstream ecosystems as previously observed (e.g. Wiegner et al. 2005), especially during time of loss of hydrological connectivity with the soil of the catchment (Demars 2018). The simple comparison between flow food webs (Fig. 10) suggest that the addition of labile carbon did not prime the bacterial use of natural allochthonous DOC.



## 792 *Choice of carbon for DOC addition*

793 We initially considered to add natural DOC to the stream after isolating DOC using reverse osmosis  
794 (Sun et al. 1995; RealSoft Pro2S, US) but the product was too salty with high pH and high nutrient  
795 concentrations (Stutter and Cains 2016). While reverse osmosis may be combined with electro dialysis  
796 to avoid co-concentration of salt (Koprivnjak et al. 2006), the quantities needed for our whole-  
797 ecosystem experiment were simply too large. We also considered several commercial humate sources  
798 but rejected their use because of pH, solubility and nutrient issues. Sucrose derived from sugarcane  
799 (C4 carbon fixation) has a very distinctive carbon stable isotope signature compared to the autotrophs  
800 in temperate ecosystems (C3 carbon fixation). It offered the possibility to trace its fate through the  
801 food web, and even to identify the bacterial carbon pathways in the control streams. It turned out that  
802 sucrose was a more judicious choice than first thought because labile DOC (polysaccharide, amino  
803 acids) is likely driving the respiration of the studied streams at the land-water interface (Demars  
804 2018), as found in bioreactors (e.g. Drake et al. 2015).

805

## 806 **Conclusions**

807 Part of the carbon derived from allochthonous organic matter can feed the autotrophs via the CO<sub>2</sub>  
808 produced by stream bacterial respiration, intermingling the green and brown webs. The interaction  
809 between autotrophs and bacteria shifted from mutualism to competition with carbon addition under  
810 nutrient limitation (N, P) increasing biotic CO<sub>2</sub> emissions. Without nutrient limitation, mutualism  
811 could be reinforced by a positive feedback loop, maintaining the same biotic CO<sub>2</sub> emissions. Even a  
812 small increase in labile dissolved organic carbon supply due to climate and land use change could  
813 have large effects on stream food web and biogeochemistry with implications for the global C cycle  
814 under stoichiometric constraints.

815

816

## 817 **Acknowledgments**

818 We thank Carol Taylor and Helen Watson for managing the long-term monitoring, Yvonne Cook and  
819 Susan McIntyre for running water chemical analyses, Claire Abel for the phospholipid fatty acid  
820 extraction, Maureen Procee for running the compound specific isotope ratio analysis, Gillian Martin  
821 for preparing and running the samples for stable isotope ratio analysis, Glensaugh farm manager  
822 Donald Barrie for hosting BOLD and JLK during the experiment and facilitating our work, and  
823 Baptiste Marteau for help with macroinvertebrate identification and comments on the manuscript.  
824 This study was funded by the Scottish Government Rural and Environmental Science and Analytical  
825 Services (RESAS), with additional funding support as part of the UK Environmental Change Network  
826 (ECN), and NERC Macronutrient Cycles Program. The writing up was partly funded by the  
827 Norwegian Institute for Water Research (NIVA). The authors acknowledge the provision of data  
828 forming part of the ECN wide dataset, <https://catalogue.ceh.ac.uk/documents/456c24dd-0fe8-46c0-8ba5-855c001bc05f>.  
829

830

831

## 832 **References**

833

834 Amin, S. A., L. R. Hmelo, H. M. van Tol, B. P. Durham, L. T. Carlson, K. R. Heal, R. L. Morales, C.  
835 T. Berthiaume, M. S. Parker, B. Djunaedi, A. E. Ingalls, M. R. Parsek, M. A. Moran, and E.  
836 V. Armbrust. 2015. Interaction and signalling between a cosmopolitan phytoplankton and  
837 associated bacteria. *Nature* **522**:98-101.

- 838 Augspurger, C., G. Gleixner, C. Kramer, and K. Kusel. 2008. Tracking carbon flow in a 2-week-old  
839 and 6-week-old stream biofilm food web. *Limnology and Oceanography* **53**:642-650.
- 840 Battin, T. J., K. Besemer, M. M. Bengtsson, A. M. Romani, and A. I. Packmann. 2016. The ecology  
841 and biogeochemistry of stream biofilms. *Nature Reviews Microbiology* **14**:251-263.
- 842 Beaulieu, J. J., C. P. Arango, D. A. Balz, and W. D. Shuster. 2013. Continuous monitoring reveals  
843 multiple controls on ecosystem metabolism in a suburban stream. *Freshwater Biology* **58**:918-  
844 937.
- 845 Bec, A., M.-E. Perga, A. Koussoroplis, G. Bardoux, C. Desvillettes, G. Bourdier, and A. Mariotti.  
846 2011. Assessing the reliability of fatty acid-specific stable isotope analysis for trophic studies.  
847 *Methods in Ecology and Evolution* **2**:651-659.
- 848 Berggren, M., and P. A. del Giorgio. 2015. Distinct patterns of microbial metabolism associated to  
849 riverine dissolved organic carbon of different source and quality. *Journal of Geophysical*  
850 *Research-Biogeosciences* **120**:989-999.
- 851 Berggren, M., J. F. Lapierre, and P. A. del Giorgio. 2012. Magnitude and regulation of  
852 bacterioplankton respiratory quotient across freshwater environmental gradients. *Isme Journal*  
853 **6**:984-993.
- 854 Berggren, M., H. Laudon, and M. Jansson. 2009. Hydrological control of organic carbon support for  
855 bacterial growth in boreal headwater streams. *Microbial Ecology* **57**:170-178.
- 856 Bernhardt, E. S., and G. E. Likens. 2002. Dissolved organic carbon enrichment alters nitrogen  
857 dynamics in a forest stream. *Ecology* **83**:1689-1700.
- 858 Billett, M. F., K. J. Dinsmore, R. P. Smart, M. H. Garnett, J. Holden, P. Chapman, A. J. Baird, R.  
859 Grayson, and A. W. Stott. 2012. Variable source and age of different forms of carbon released  
860 from natural peatland pipes. *Journal of Geophysical Research-Biogeosciences* **117**:g02003.
- 861 Billett, M. F., and M. H. Garnett. 2010. Isotopic composition of carbon dioxide lost by evasion from  
862 surface water to the atmosphere: Methodological comparison of a direct and indirect  
863 approach. *Limnology and Oceanography-Methods* **8**:45-53.
- 864 Bligh, E. G., and W. J. Dyer. 1959. A rapid method of total lipid extraction and purification. *Canadian*  
865 *journal of biochemistry and physiology* **37**:911-917.
- 866 Boller, A., P. Thomas, C. Cavanaugh, and K. Scott. 2015. Isotopic discrimination and kinetic  
867 parameters of RubisCO from the marine bloom-forming diatom, *Skeletonema costatum*.  
868 *Geobiology* **13**:33-43.
- 869 Borges, A. V., F. Darchambeau, C. R. Teodoru, T. R. Marwick, F. Tamooh, N. Geeraert, F. O.  
870 Omengo, F. Guerin, T. Lambert, C. Morana, E. Okuku, and S. Bouillon. 2015. Globally  
871 significant greenhouse-gas emissions from African inland waters. *Nature Geoscience* **8**:637-  
872 642.
- 873 Boschker, H. T. S., and J. J. Middelburg. 2002. Stable isotopes and biomarkers in microbial ecology.  
874 *Fems Microbiology Ecology* **40**:85-95.
- 875 Brett, M. T. 2014. Resource polygon geometry predicts Bayesian stable isotope mixing model bias.  
876 *Marine Ecology Progress Series* **514**:1-12.
- 877 Brett, M. T., S. E. Bunn, S. Chandra, A. W. E. Galloway, F. Guo, M. J. Kainz, P. Kankaala, D. C. P.  
878 Lau, T. P. Moulton, M. E. Power, J. B. Rasmussen, S. J. Taipale, J. H. Thorp, and J. D. Wehr.  
879 2017. How important are terrestrial organic carbon inputs for secondary production in  
880 freshwater ecosystems? *Freshwater Biology* **62**:833-853.
- 881 Brunke, M., and T. Gonser. 1997. The ecological significance of exchange processes between rivers  
882 and groundwater. *Freshwater Biology* **37**:1-33.
- 883 Butler, J. N. 1982. Carbon dioxide equilibria and their applications. 1st edition. Addison-Wesley,  
884 Reading.
- 885 Carr, G. M., A. Morin, and P. A. Chambers. 2005. Bacteria and algae in stream periphyton along a  
886 nutrient gradient. *Freshwater Biology* **50**:1337-1350.
- 887 Carroll, J. J., J. D. Slupsky, and A. E. Mather. 1991. The solubility of carbon dioxide in water at low  
888 pressure. *Journal of Physical and Chemical Reference Data* **20**:1201-1209.
- 889 Certini, G., C. D. Campbell, and A. C. Edwards. 2004. Rock fragments in soil support a different  
890 microbial community from the fine earth. *Soil Biology and Biochemistry* **36**:1119-1128.

- 891 Ciborowski, J. J. H., D. A. Craig, and K. M. Fry. 1997. Dissolved organic matter as food for black fly  
892 larvae (Diptera : Simuliidae). *Journal of the North American Benthological Society* **16**:771-  
893 780.
- 894 Cole, J. J. 2013. *Freshwater Ecosystems and the Carbon Cycle*. International Ecology Institute,  
895 Oldendorf, Germany.
- 896 Collins, S. M., J. P. Sparks, S. A. Thomas, S. A. Wheatley, and A. S. Flecker. 2016. Increased light  
897 availability reduces the importance of bacterial carbon in headwater stream food webs.  
898 *Ecosystems* **19**:396-410.
- 899 Cooper, R., V. Thoss, and H. Watson. 2007. Factors influencing the release of dissolved organic  
900 carbon and dissolved forms of nitrogen from a small upland headwater during autumn runoff  
901 events. *Hydrological Processes* **21**:622-633.
- 902 Cory, R. M., C. P. Ward, B. C. Crump, and G. W. Kling. 2014. Sunlight controls water column  
903 processing of carbon in arctic fresh waters. *Science* **345**:925-928.
- 904 Cotner, J. B., E. K. Hall, J. T. Scott, and M. Heldal. 2010. Freshwater bacteria are stoichiometrically  
905 flexible with a nutrient composition similar to seston. *Frontiers in Microbiology* **1**:132.
- 906 Couch, C. A., J. L. Meyer, and R. O. Hall. 1996. Incorporation of bacterial extracellular  
907 polysaccharide by black fly larvae (Simuliidae). *Journal of the North American Benthological*  
908 *Society* **15**:289-299.
- 909 Cummins, K. W., J. J. Klug, R. G. Wetzel, R. C. Petersen, K. F. Suberkropp, B. A. Manny, J. C.  
910 Wuycheck, and F. O. Howard. 1972. Organic enrichment with leaf leachate in experimental  
911 lotic ecosystems. *Bioscience* **22**:719-722.
- 912 Currie, D. J., and J. Kalff. 1984. Can bacteria outcompete phytoplankton for phosphorus? A  
913 chemostat test. *Microbial Ecology* **10**:205-216.
- 914 Daufresne, T., and M. Loreau. 2001. Ecological stoichiometry, primary producer-decomposer  
915 interactions, and ecosystem persistence. *Ecology* **82**:3069-3082.
- 916 Davidson, J. F., and E. J. Cullen. 1957. The determination of diffusion coefficients for sparingly  
917 solubles gases in liquids *Transactions of the Institution of Chemical Engineers (Great Britain)*  
918 **35**:51-60.
- 919 Dawson, J. J. C. 2013. Losses of soil carbon to the atmosphere via inland surface waters. Pages 183-  
920 208 *in* R. Lal, editor. *Ecosystem Services and Carbon Sequestration in the Biosphere*.  
921 Springer Science, Dordrecht
- 922 de Castro, D. M. P., D. R. de Carvalho, P. D. Pompeu, M. Z. Moreira, G. B. Nardoto, and M. Callisto.  
923 2016. Land use influences niche size and the assimilation of resources by benthic  
924 macroinvertebrates in tropical headwater streams. *PLoS ONE* **11**.
- 925 del Giorgio, P. A., and J. J. Cole. 1998. Bacterial growth efficiency in natural aquatic systems. *Annual*  
926 *Review of Ecology and Systematics* **29**:503-541.
- 927 Demars, B. O. L. 2008. Whole-stream phosphorus cycling: Testing methods to assess the effect of  
928 saturation of sorption capacity on nutrient uptake length measurements. *Water Research*  
929 **42**:2507-2516.
- 930 Demars, B. O. L. 2018. Hydrological pulses and burning of dissolved organic carbon by stream  
931 respiration. *Limnology and Oceanography*:10.1002/lno.11048.
- 932 Demars, B. O. L., and A. C. Edwards. 2007. Tissue nutrient concentrations in freshwater aquatic  
933 macrophytes: high inter-taxon differences and low phenotypic response to nutrient supply.  
934 *Freshwater Biology* **52**:2073-2086.
- 935 Demars, B. O. L., G. M. Gislason, J. S. Olafsson, J. R. Manson, N. Friberg, J. M. Hood, J. J. D.  
936 Thompson, and T. E. Freitag. 2016. Impact of warming on CO<sub>2</sub> emissions from streams  
937 countered by aquatic photosynthesis. *Nature Geoscience* **9**:758-761.
- 938 Demars, B. O. L., J. L. Kemp, N. Friberg, P. Usseglio-Polatera, and D. M. Harper. 2012. Linking  
939 biotopes to invertebrates in rivers: biological traits, taxonomic composition and diversity.  
940 *Ecological Indicators* **23**:301-311.
- 941 Demars, B. O. L., J. R. Manson, J. S. Olafsson, G. M. Gislason, and N. Friberg. 2011a. Stream  
942 hydraulics and temperature determine the metabolism of geothermal Icelandic streams.  
943 *Knowledge and Management of Aquatic Ecosystems* **402**:05.

- 944 Demars, B. O. L., J. R. Manson, J. S. Olafsson, G. M. Gislason, R. Gudmundsdottir, G. Woodward, J.  
945 Reiss, D. E. Pichler, J. J. Rasmussen, and N. Friberg. 2011b. Temperature and the metabolic  
946 balance of streams. *Freshwater Biology* **56**:1106-1121.
- 947 Demars, B. O. L., J. Thompson, and J. R. Manson. 2015. Stream metabolism and the open diel  
948 oxygen method: Principles, practice, and perspectives. *Limnology and Oceanography-  
949 Methods* **13**:356-374.
- 950 Demars, B. O. L., J. Thompson, and J. R. Manson. 2017. Stream metabolism and the open diel  
951 oxygen method: Principles, practice, and perspectives (vol 13, pg 356, 2015). *Limnology and  
952 Oceanography-Methods* **15**:219.
- 953 Drake, T. W., P. A. Raymond, and R. G. M. Spencer. 2018. Terrestrial carbon inputs to inland waters:  
954 a current synthesis of estimates and uncertainty. *Limnology and Oceanography Letters* **3**:132-  
955 142.
- 956 Drake, T. W., K. P. Wickland, R. G. M. Spencer, D. M. McKnight, and R. G. Striegl. 2015. Ancient  
957 low-molecular-weight organic acids in permafrost fuel rapid carbon dioxide production upon  
958 thaw. *Proceedings of the National Academy of Sciences of the United States of America*  
959 **112**:13946-13951.
- 960 Evans, C. D., M. N. Futter, F. Moldan, S. Valinia, Z. Frogbrook, and D. N. Kothawala. 2017.  
961 Variability in organic carbon reactivity across lake residence time and trophic gradients.  
962 *Nature Geoscience* **10**:832-835.
- 963 Fasching, C., B. Behounek, G. A. Singer, and T. J. Battin. 2014. Microbial degradation of terrigenous  
964 dissolved organic matter and potential consequences for carbon cycling in brown-water  
965 streams. *Scientific Reports* **4**:4981.
- 966 Findlay, R. H. 2004. Determination of microbial community structure using phospholipid fatty acid  
967 profiles. Pages 983-1004 in G. A. Kowalchuk, F. de Bruijn, I. M. Head, A. J. Van der Zijpp,  
968 and J. D. van Elsas, editors. *Molecular Microbial Ecology Manual*. Kluwer Academic  
969 Publishers, Netherlands.
- 970 Finlay, J. C., and W. B. Bowden. 1994. Controls on production of bryophytes in an Arctic tundra  
971 stream. *Freshwater Biology* **32**:455-465.
- 972 Fischer, H., and M. Pusch. 2001. Comparison of bacterial production in sediments, epiphyton and the  
973 pelagic zone of a lowland river. *Freshwater Biology* **46**:1335-1348.
- 974 Freeman, C., N. Fenner, N. J. Ostle, H. Kang, D. J. Dowrick, B. Reynolds, M. A. Lock, D. Sleep, S.  
975 Hughes, and J. Hudson. 2004. Export of dissolved organic carbon from peatlands under  
976 elevated carbon dioxide levels. *Nature* **430**:195-198.
- 977 Friberg, N., and M. J. Winterbourn. 1996. Interactions between riparian leaves and algal/microbial  
978 activity in streams. *Hydrobiologia* **341**:51-56.
- 979 Frostegård, A., A. Tunlid, and E. Baath. 1993. Phospholipid fatty acid composition, biomass, and  
980 activity of microbial communities from two soil types experimentally exposed to different  
981 heavy metals. *Applied and Environmental Microbiology* **59**:3605-3617.
- 982 Fukuda, M., J. Matsuyama, T. Katano, S. Nakano, and F. Dazzo. 2006. Assessing primary and  
983 bacterial production rates in biofilms on pebbles in Ishite stream, Japan. *Microbial Ecology*  
984 **52**:1-9.
- 985 Gladyshev, M. I., N. N. Sushchik, O. V. Anishchenko, O. N. Makhutova, V. I. Kolmakov, G. S.  
986 Kalachova, A. A. Kolmakova, and O. P. Dubovskaya. 2011. Efficiency of transfer of essential  
987 polyunsaturated fatty acids versus organic carbon from producers to consumers in a eutrophic  
988 reservoir. *Oecologia* **165**:521-531.
- 989 Gladyshev, M. I., N. N. Sushchik, O. N. Makhutova, and G. S. Kalachova. 2014. Trophic  
990 fractionation of isotope composition of polyunsaturated fatty acids in the trophic chain of a  
991 river ecosystem. *Doklady Biochemistry and Biophysics* **454**:4-5.
- 992 Gladyshev, M. I., N. N. Sushchik, S. P. Shulepina, A. V. Ageev, O. P. Dubovskaya, A. A.  
993 Kolmakova, and G. S. Kalachova. 2016. Secondary production of highly unsaturated fatty  
994 acids by zoobenthos across rivers contrasting in temperature. *River Research and  
995 Applications* **32**:1252-1263.
- 996 Golubkov, S. M. 2000. *Functional Ecology of Aquatic Insects*. Russian Academy of Sciences,  
997 Proceeding of the Zoological Institute, St Petersburg.



- 998 Grossart, H. P. 2010. Ecological consequences of bacterioplankton lifestyles: changes in concepts are  
999 needed. *Environmental Microbiology Reports* **2**:706-714.
- 1000 Hall, R. O. 1995. Use of a stable carbon isotope addition to trace bacterial carbon through a stream  
1001 food web. *Journal of the North American Benthological Society* **14**:269-277.
- 1002 Hall, R. O., Jr., J. L. Tank, M. A. Baker, E. J. Rosi-Marshall, and E. R. Hotchkiss. 2016. Metabolism,  
1003 gas exchange, and carbon spiraling in rivers. *Ecosystems* **19**:73-86.
- 1004 Hall, R. O., and J. L. Meyer. 1998. The trophic significance of bacteria in a detritus-based stream food  
1005 web. *Ecology* **79**:1995-2012.
- 1006 Hayes, J. M. 2001. Fractionation of the isotopes of carbon and hydrogen in biosynthetic processes.  
1007 Pages 225-277 in J. W. Valley and D. Cole, editors. *Stable Isotope Geochemistry*.  
1008 Mineralogical Society of America, Boston.
- 1009 Hershey, A. E., R. W. Merritt, M. C. Miller, and J. S. McCrea. 1996. Organic matter processing by  
1010 larval black flies in a temperate woodland stream. *Oikos* **75**:524-532.
- 1011 Hill Farming Research Organisation. 1983. Glensaugh Research Station. D & J Croal, Haddington.
- 1012 Hotchkiss, E. R., and R. O. Hall. 2015. Whole-stream C-13 tracer addition reveals distinct fates of  
1013 newly fixed carbon. *Ecology* **96**:403-416.
- 1014 Hotchkiss, E. R., R. O. Hall, Jr., M. A. Baker, E. J. Rosi-Marshall, and J. L. Tank. 2014. Modeling  
1015 priming effects on microbial consumption of dissolved organic carbon in rivers. *Journal of*  
1016 *Geophysical Research-Biogeosciences* **119**:982-995.
- 1017 Hotchkiss, E. R., R. O. Hall, Jr., R. A. Sponseller, D. Butman, J. Klaminder, H. Laudon, M. Rosvall,  
1018 and J. Karlsson. 2015. Sources of and processes controlling CO<sub>2</sub> emissions change with the  
1019 size of streams and rivers. *Nature Geoscience* **8**:696-699.
- 1020 Jahren, A. H., C. Saudek, E. H. Yeung, W. H. L. Kao, R. A. Kraft, and B. Caballero. 2006. An  
1021 isotopic method for quantifying sweeteners derived from corn and sugar cane. *American*  
1022 *Journal of Clinical Nutrition* **84**:1380-1384.
- 1023 Kahlert, M. 1998. C:N:P ratios of freshwater benthic algae. *Archiv für Hydrobiologie, Advances in*  
1024 *Limnology* **51**:105-114.
- 1025 Kamjunke, N., P. Herzsprung, and T. R. Neu. 2015. Quality of dissolved organic matter affects  
1026 planktonic but not biofilm bacterial production in streams. *Science of the Total Environment*  
1027 **506**:353-360.
- 1028 Kankaala, P., S. Peura, H. Nykanen, E. Sonninen, S. Taipale, M. Tirola, and R. I. Jones. 2010.  
1029 Impacts of added dissolved organic carbon on boreal freshwater pelagic metabolism and food  
1030 webs in mesocosm experiments. *Fundamental and Applied Limnology* **177**:161-176.
- 1031 Kinross, J. H., N. Christofi, P. A. Read, and R. Harriman. 1993. Filamentous algal communities  
1032 related to pH in streams in The Trossachs, Scotland. *Freshwater Biology* **30**:301-317.
- 1033 Kominoski, J. S., A. D. Rosemond, J. P. Benstead, V. Gulis, and D. W. P. Manning. 2018.  
1034 Experimental nitrogen and phosphorus additions increase rates of stream ecosystem  
1035 respiration and carbon loss. *Limnology and Oceanography* **63**:22-36.
- 1036 Koprivnjak, J. F., E. M. Perdue, and P. H. Pfromm. 2006. Coupling reverse osmosis with  
1037 electro dialysis to isolate natural organic matter from fresh waters. *Water Research* **40**:3385-  
1038 3392.
- 1039 Kuehn, K. A., S. N. Francoeur, R. H. Findlay, and R. K. Neely. 2014. Priming in the microbial  
1040 landscape: periphytic algal stimulation of litter-associated microbial decomposers. *Ecology*  
1041 **95**:749-762.
- 1042 Kunc, F., R. A. Lokhmacheva, and J. Macura. 1976. Biological decomposition of fulvic acid  
1043 preparations. *Folia Microbiologica* **21**:257-267.
- 1044 Le Cren, E. D., and R. H. Lowe-McConnell, editors. 1980. *The functioning of freshwater ecosystems*.  
1045 Cambridge University Press, Cambridge.
- 1046 Lyon, D. R., and S. E. Ziegler. 2009. Carbon cycling within epilithic biofilm communities across a  
1047 nutrient gradient of headwater streams. *Limnology and Oceanography* **54**:439-449.
- 1048 Main, C., H. Ruhl, D. Jones, A. Yool, B. Thornton, and D. Mayor. 2015. Hydrocarbon contamination  
1049 affects deep-sea benthic oxygen uptake and microbial community composition. *Deep Sea*  
1050 *Research Part I: Oceanographic Research Papers* **100**:79-87.



- 1051 Marcarelli, A. M., C. V. Baxter, M. M. Mineau, and R. O. Hall, Jr. 2011. Quantity and quality:  
1052 unifying food web and ecosystem perspectives on the role of resource subsidies in  
1053 freshwaters. *Ecology* **92**:1215-1225.
- 1054 McNevin, D. B., M. R. Badger, S. M. Whitney, S. von Caemmerer, G. G. Tcherkez, and G. D.  
1055 Farquhar. 2007. Differences in carbon isotope discrimination of three variants of d-ribulose-1,  
1056 5-bisphosphate carboxylase/oxygenase reflect differences in their catalytic mechanisms.  
1057 *Journal of Biological Chemistry* **282**:36068-36076.
- 1058 Mineau, M. M., W. M. Wollheim, I. Buffam, S. E. G. Findlay, R. O. Hall, E. R. Hotchkiss, L. E.  
1059 Koenig, W. H. McDowell, and T. B. Parr. 2016. Dissolved organic carbon uptake in streams:  
1060 A review and assessment of reach-scale measurements. *Journal of Geophysical Research-*  
1061 *Biogeosciences* **121**:2019-2029.
- 1062 Monteith, D. T., J. L. Stoddard, C. D. Evans, H. A. de Wit, M. Forsius, T. Hogasen, A. Wilander, B.  
1063 L. Skjelkvale, D. S. Jeffries, J. Vuorenmaa, B. Keller, J. Kopacek, and J. Vesely. 2007.  
1064 Dissolved organic carbon trends resulting from changes in atmospheric deposition chemistry.  
1065 *Nature* **450**:537-539.
- 1066 Morel, A., and R. C. Smith. 1974. Relation between total quanta and total energy for aquatic  
1067 photosynthesis. *Limnology and Oceanography* **19**:591-600.
- 1068 Morin, A., and P. Dumont. 1994. A simple model to estimate growth rate of lotic insect larvae and its  
1069 value for estimating population and community production. *Journal of the North American*  
1070 *Benthological Society* **13**:357-367.
- 1071 Mulholland, P. J., J. L. Tank, J. R. Webster, W. B. Bowden, W. K. Dodds, S. V. Gregory, N. B.  
1072 Grimm, S. K. Hamilton, S. L. Johnson, E. Marti, W. H. McDowell, J. L. Merriam, J. L.  
1073 Meyer, B. J. Peterson, H. M. Valett, and W. M. Wollheim. 2002. Can uptake length in  
1074 streams be determined by nutrient addition experiments? Results from an interbiome  
1075 comparison study. *Journal of the North American Benthological Society* **21**:544-560.
- 1076 Muller-Navarra, D. C., M. T. Brett, A. M. Liston, and C. R. Goldman. 2000. A highly unsaturated  
1077 fatty acid predicts carbon transfer between primary producers and consumers. *Nature* **403**:74-  
1078 77.
- 1079 Neal, C., W. A. House, and K. Down. 1998. An assessment of excess carbon dioxide partial pressures  
1080 in natural waters based on pH and alkalinity measurements. *The Science of the Total*  
1081 *Environment* **210/211**:173-185.
- 1082 Neely, R. K., and R. G. Wetzel. 1995. Simultaneous use of <sup>14</sup>C and <sup>3</sup>H to determine autotrophic  
1083 production and bacterial protein production in periphyton. *Microbial Ecology* **30**:227-237.
- 1084 Newbold, J. D., P. J. Mulholland, J. W. Elwood, and R. V. Oneill. 1982. Organic carbon spiralling in  
1085 stream ecosystems. *Oikos* **38**:266-272.
- 1086 Odum, H. T. 1956. Primary production in flowing waters. *Limnology and Oceanography* **1**:102-117.
- 1087 Oviedo-Vargas, D., T. V. Royer, and L. T. Johnson. 2013. Dissolved organic carbon manipulation  
1088 reveals coupled cycling of carbon, nitrogen, and phosphorus in a nitrogen-rich stream.  
1089 *Limnology and Oceanography* **58**:1196-1206.
- 1090 Palmer, S. M., D. Hope, M. F. Billett, F. H. Dawson, and C. L. Bryant. 2001. Sources of organic and  
1091 inorganic carbon in a headwater stream: evidence from carbon isotope studies.  
1092 *Biogeochemistry* **52**:321-338.
- 1093 Parkyn, S. M., J. M. Quinn, T. J. Cox, and N. Broekhuizen. 2005. Pathways of N and C uptake and  
1094 transfer in stream food webs: an isotope enrichment experiment. *Journal of the North*  
1095 *American Benthological Society* **24**:955-975.
- 1096 Parnell, A. C., R. Inger, S. Bearhop, and A. L. Jackson. 2010. Source partitioning using stable  
1097 isotopes: coping with too much variation. *PLoS ONE* **5**:e9672.
- 1098 Phillips, D. L., and J. W. Gregg. 2001. Uncertainty in source partitioning using stable isotopes.  
1099 *Oecologia* **127**:171-179.
- 1100 Pusch, M., D. Fiebig, I. Brettar, H. Eisenmann, B. K. Ellis, L. A. Kaplan, M. A. Lock, M. W. Naegeli,  
1101 and W. Traunspurger. 1998. The role of micro-organisms in the ecological connectivity of  
1102 running waters. *Freshwater Biology* **40**:453-495.
- 1103 R Core Team. 2015. R: A language and environment for statistical computing. R Foundation for  
1104 Statistical Computing. Vienna, Austria.

- 1105 Raven, J. A., A. M. Johnston, J. R. Newman, and C. M. Scrimgeour. 1994. Inorganic carbon  
1106 acquisition by aquatic photolithotrophs of the Dighty Burn, Angus, UK - Uses and limitations  
1107 of natural abundance measurements of carbon isotopes. *New Phytologist* **127**:271-286.
- 1108 Risse-Buhl, U., N. Trefzger, A. G. Seifert, W. Schonborn, G. Gleixner, and K. Kusel. 2012. Tracking  
1109 the autochthonous carbon transfer in stream biofilm food webs. *Fems Microbiology Ecology*  
1110 **79**:118-131.
- 1111 Robbins, C. J., R. S. King, A. D. Yeager, C. M. Walker, J. A. Back, R. D. Doyle, and D. F. Whigham.  
1112 2017. Low-level addition of dissolved organic carbon increases basal ecosystem function in a  
1113 boreal headwater stream. *Ecosphere* **8**:e01739.
- 1114 Roberts, B. J., P. J. Mulholland, and W. R. Hill. 2007. Multiple scales of temporal variability in  
1115 ecosystem metabolism rates: Results from 2 years of continuous monitoring in a forested  
1116 headwater stream. *Ecosystems* **10**:588-606.
- 1117 Schade, J. D., K. MacNeill, S. A. Thomas, F. C. McNeely, J. R. Welter, J. Hood, M. Goodrich, M. E.  
1118 Power, and J. C. Finlay. 2011. The stoichiometry of nitrogen and phosphorus spiralling in  
1119 heterotrophic and autotrophic streams. *Freshwater Biology* **56**:424-436.
- 1120 Scott, J. T., J. A. Back, J. M. Taylor, and R. S. King. 2008. Does nutrient enrichment decouple algal-  
1121 bacterial production in periphyton? *Journal of the North American Benthological Society*  
1122 **27**:332-344.
- 1123 Southgate, D. A. T., and J. V. G. A. Durnin. 1970. Calorie conversion factors - an experimental  
1124 reassessment of factors used in calculation of energy value of human diets. *British Journal of*  
1125 *Nutrition* **24**:517-535.
- 1126 Stream Solute Workshop. 1990. Concepts and methods for assessing solute dynamics in stream  
1127 ecosystems. *Journal of the North American Benthological Society* **9**:95-119.
- 1128 Stumm, W., and J. J. Morgan. 1981. *Aquatic Chemistry. An introduction emphasizing chemical*  
1129 *equilibria in natural waters.* Wiley Interscience, New York.
- 1130 Stutter, M. I., and J. Cains. 2016. The mineralisation of dissolved organic matter recovered from  
1131 temperate waterbodies during summer. *Aquatic Sciences* **78**:447-462.
- 1132 Stutter, M. I., S. M. Dunn, and D. G. Lumsdon. 2012. Dissolved organic carbon dynamics in a UK  
1133 podzolic moorland catchment: linking storm hydrochemistry, flow path analysis and sorption  
1134 experiments. *Biogeosciences* **9**:2159-2175.
- 1135 Stutter, M. I., D. G. Lumsdon, and A. P. Rowland. 2011. Three representative UK moorland soils  
1136 show differences in decadal release of dissolved organic carbon in response to environmental  
1137 change. *Biogeosciences* **8**:3661-3675.
- 1138 Stutter, M. I., S. Richards, and J. J. C. Dawson. 2013. Biodegradability of natural dissolved organic  
1139 matter collected from a UK moorland stream. *Water Research* **47**:1169-1180.
- 1140 Sun, L., E. M. Perdue, and J. F. McCarthy. 1995. Using reverse osmosis to obtain organic matter from  
1141 surface and ground waters. *Water Research* **29**:1471-1477.
- 1142 Vander Zanden, M. J., M. K. Clayton, E. K. Moody, C. T. Solomon, and B. C. Weidel. 2015. Stable  
1143 isotope turnover and half-life in animal tissues: a literature synthesis. *PLoS ONE*  
1144 **10**:e0116182.
- 1145 Waldron, S., E. M. Scott, and C. Soulsby. 2007. Stable isotope analysis reveals lower-order river  
1146 dissolved inorganic carbon pools are highly dynamic. *Environmental Science & Technology*  
1147 **41**:6156-6162.
- 1148 Warren, D. E., J. H. Wales, G. E. Davis, and P. Doudoroff. 1964. Trout production in an experimental  
1149 stream enriched with sucrose. *Journal of Wildlife Management* **28**:617-660.
- 1150 Welti, N., M. Striebel, A. J. Ulseth, W. F. Cross, S. DeVilbiss, P. M. Glibert, L. Guo, A. G. Hirst, J.  
1151 Hood, J. S. Kominoski, K. L. MacNeill, A. S. Mehring, J. R. Welter, and H. Hillebrand. 2017.  
1152 Bridging food webs, ecosystem metabolism, and biogeochemistry using ecological  
1153 stoichiometry theory. *Frontiers in Microbiology* **8**:1298.
- 1154 Wetzel, R. G. 2001. *Limnology. Lake and river ecosystems.* 3 edition. Academic Press, San Diego.
- 1155 Wiegner, T. N., L. A. Kaplan, J. D. Newbold, and P. H. Ostrom. 2005. Contribution of dissolved  
1156 organic C to stream metabolism: a mesocosm study using C-13-enriched tree-tissue leachate.  
1157 *Journal of the North American Benthological Society* **24**:48-67.
- 1158 Wiegner, T. N., L. A. Kaplan, S. E. Ziegler, and R. H. Findlay. 2015. Consumption of terrestrial  
1159 dissolved organic carbon by stream microorganisms. *Aquatic Microbial Ecology* **75**:225-237.

- 1160 Wilcox, H. S., J. B. Wallace, J. L. Meyer, and J. P. Benstead. 2005. Effects of labile carbon addition  
1161 on a headwater stream food web. *Limnology and Oceanography* **50**:1300-1312.
- 1162 Williams, P. J. I. B., and P. A. del Giorgio. 2005. Respiration in aquatic ecosystems: history and  
1163 background. Pages 1-17 in P. A. del Giorgio and P. J. I. B. Williams, editors. *Respiration in*  
1164 *aquatic ecosystems*. Oxford University Press, Oxford.
- 1165 Wotton, R. S. 2009. Feeding in blackfly larvae (Diptera: Simuliidae) - The capture of colloids. *Acta*  
1166 *Zoologica Lituanica* **19**:17-20.
- 1167 Wright, R. T., and J. E. Hobbie. 1966. Use of glucose and acetate by bacteria and algae in aquatic  
1168 ecosystems. *Ecology* **47**:447-464.
- 1169 Young, R. G., and A. D. Huryn. 1998. Comment: improvements to the diurnal upstream-downstream  
1170 dissolved oxygen change technique for determining whole-stream metabolism in small  
1171 streams. *Canadian Journal of Fisheries and Aquatic Sciences* **55**:1784-1785.
- 1172 Zhang, J., P. D. Quay, and D. O. Wilbur. 1995. Carbon isotope fractionation during gas water  
1173 exchange and dissolution of CO<sub>2</sub>. *Geochimica et Cosmochimica Acta* **59**:107-114.
- 1174 Zhang, J. R., and P. D. Quay. 1997. The total organic carbon export rate based on C-13 and C-12 of  
1175 DIC budgets in the equatorial Pacific region. *Deep-Sea Research Part II-Topical Studies in*  
1176 *Oceanography* **44**:2163-2190.
- 1177 Zou, K. J., E. Thebault, G. Lacroix, and S. Barot. 2016. Interactions between the green and brown  
1178 food web determine ecosystem functioning. *Functional Ecology* **30**:1454-1465.

1179

1180

1181

1182

1183

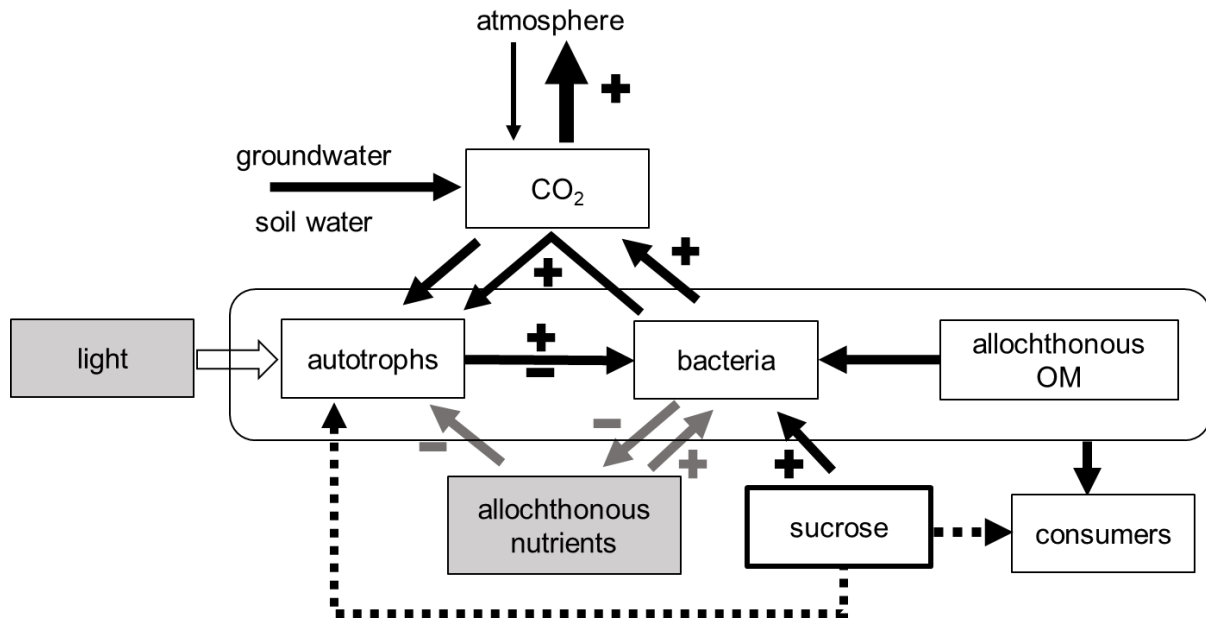

1184

1185

1186 **Fig 1.** Possible mutual benefits of algae and bacteria and expected changes (+ and – symbols) in  
1187 carbon and nutrient (N, P) fluxes due to sucrose addition. If nutrients are limiting, then C reciprocal  
1188 subsidies between bacteria and autotrophs may be weakened by sucrose addition, i.e. there could be a  
1189 shift between mutualism and competition. With enough nutrients the C microbial loop (to autotrophs)  
1190 may be strengthened via an increase in CO<sub>2</sub> from bacterial respiration, i.e. positive feedback loop.

1191

1192

1193

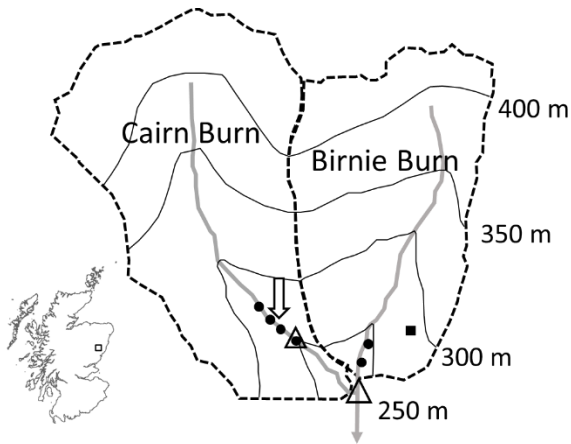

1194

1195

1196 **Fig 2.** Paired stream experiment at Glensaugh research station. Birnie Burn is the control stream and  
1197 Cairn Burn the manipulated stream with DOC addition indicated by the arrow. The Cairn Burn also  
1198 has a control upstream of the treatment reach. The symbols refer to flumes (open triangles), dissolved  
1199 oxygen stations (filled circles) and soil moisture instrumentation (filled square). The 50 m elevation  
1200 contour lines are indicated. The catchment area is 0.99 km<sup>2</sup> (0.90 km<sup>2</sup> at the flume) for Cairn Burn  
1201 and 0.76 km<sup>2</sup> for Birnie Burn. Inset shows the location of Glensaugh in Scotland.

1202

1203



1204

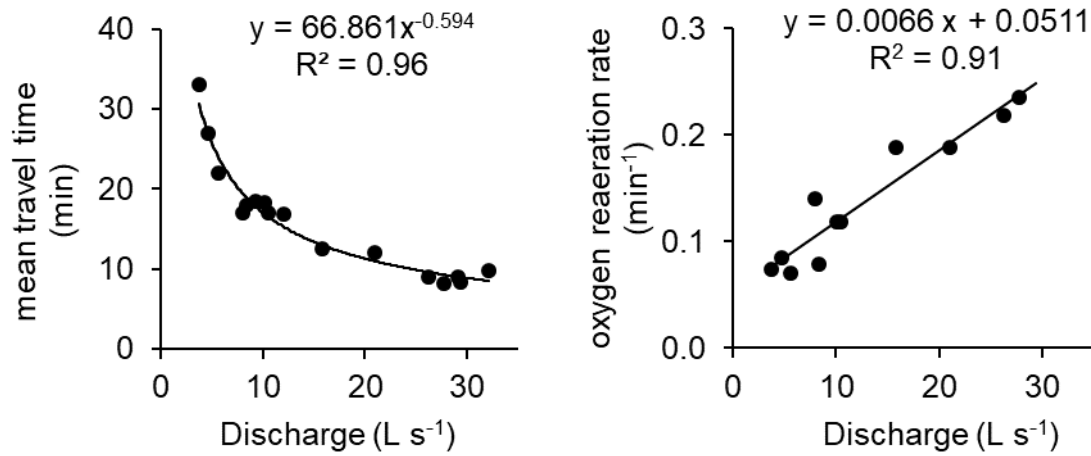

1205

1206

1207 **Fig 3.** Discharge was an excellent predictor of mean travel time and oxygen reaeration measured from  
1208 NaCl and propane tracer studies (data from Cairn treatment reach, data of the other two reaches were  
1209 presented in Demars 2018).

1210

1211

1212

1213

1214

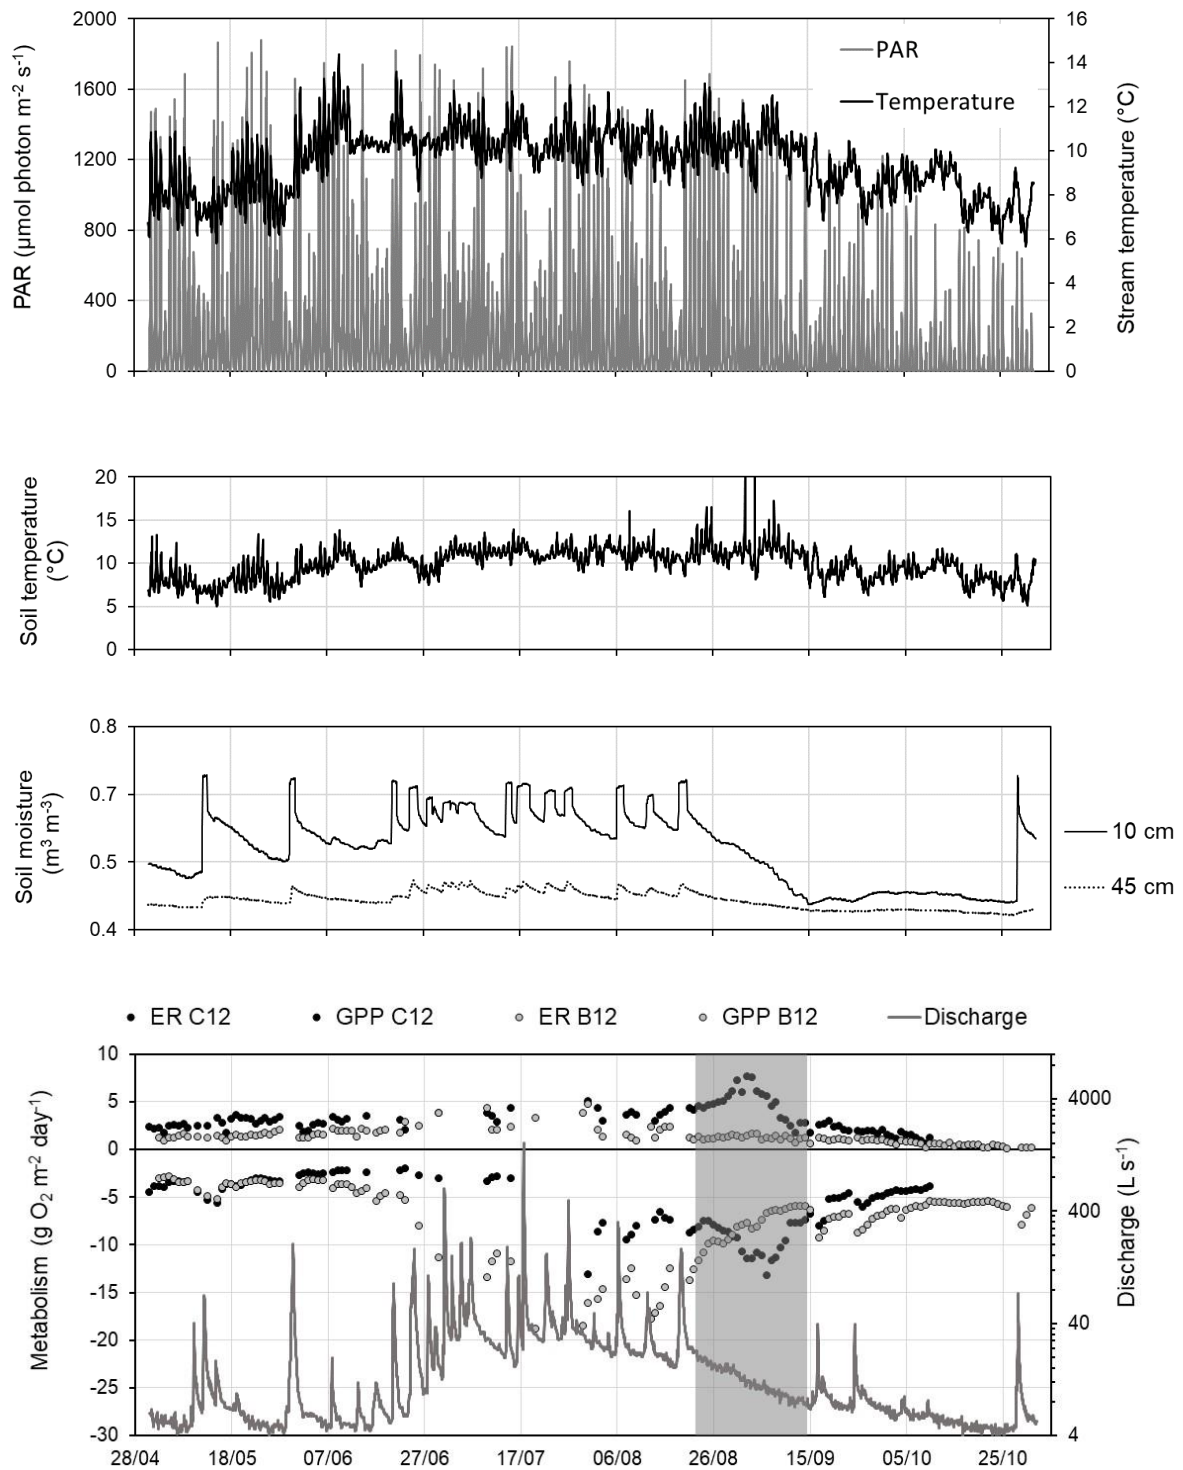

1218

1219 **Fig. 4.** Continuous data monitoring and stream metabolism in the control reach (Birnie Burn, B12)  
1220 and treatment reach (Cairn Burn, C12). Ecosystem respiration (ER) is negative (consuming O<sub>2</sub>) and  
1221 gross primary production (GPP) is positive (producing O<sub>2</sub>). The period of DOC (sucrose) addition  
1222 (23/08-14/09) is indicated by grey shading. The depths for soil moisture correspond to the depths of  
1223 the organic soil (10 cm) and subsoil (45 cm).

1224

1225

1226

1227

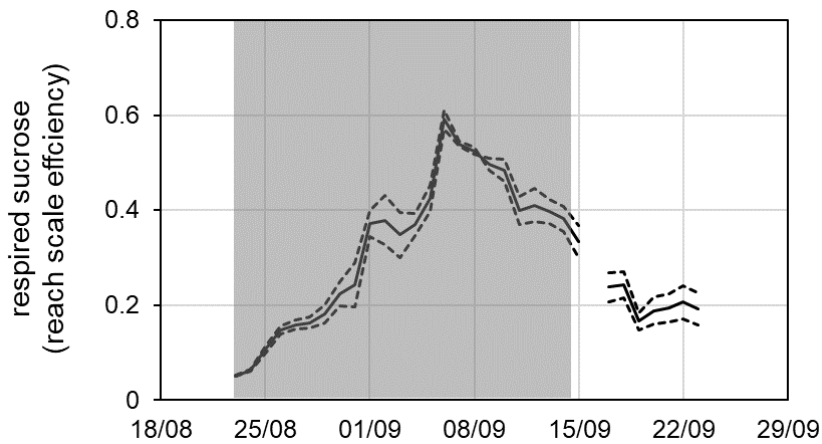

1228

1229

1230 **Fig 5.** Efficiency of respired sucrose in the 84 m long treatment reach (with mean travel time of 15  
1231 minutes) during (shaded area, 23/08-14/09) and shortly after sucrose addition, calculations based on  
1232 heterotrophic respiration in the treatment reach relative to the Birnie control (same results with Cairn  
1233 control, not shown). The black line was calculated with an autotrophic respiration (AR) of  $0.5 \times \text{GPP}$   
1234 and dashed lines with  $\text{AR} = 0.2 \times \text{GPP}$  and  $0.8 \times \text{GPP}$  (see method). On average  $35 \pm 20\%$  of the daily flux  
1235 of sucrose was respired within that reach during the sucrose addition.

1236

1237

1238

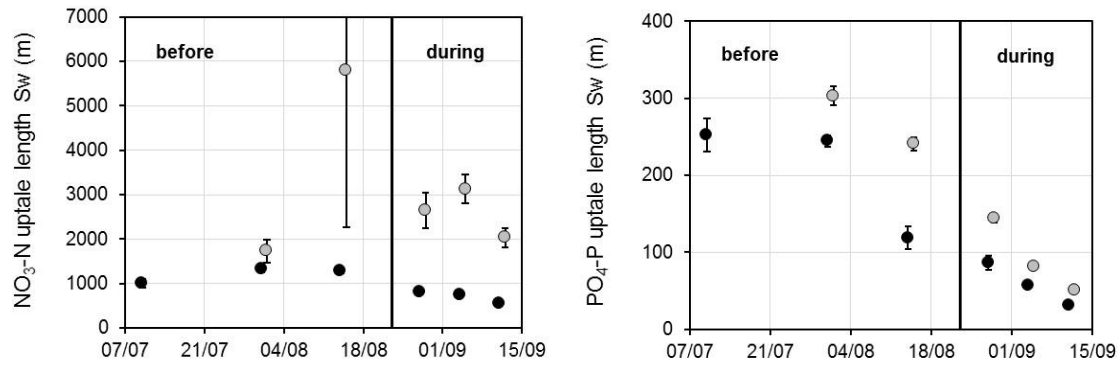

1239

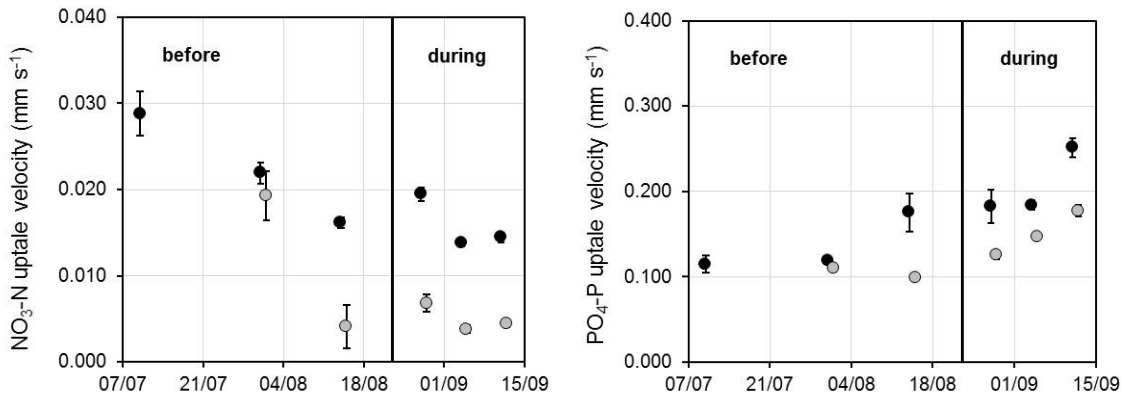

1240 **Fig. 6.** Stream nutrient uptake length ( $S_w$ ) and uptake velocity ( $v_i$ ) before and during sucrose addition  
1241 in the control (grey symbols) and treatment (black symbols). Error bars represent sem, with some  
1242 error bars smaller than the symbols. Note the different magnitudes on the y axes between  $\text{NO}_3\text{-N}$  and  
1243  $\text{PO}_4\text{-P}$ .

1244

1245

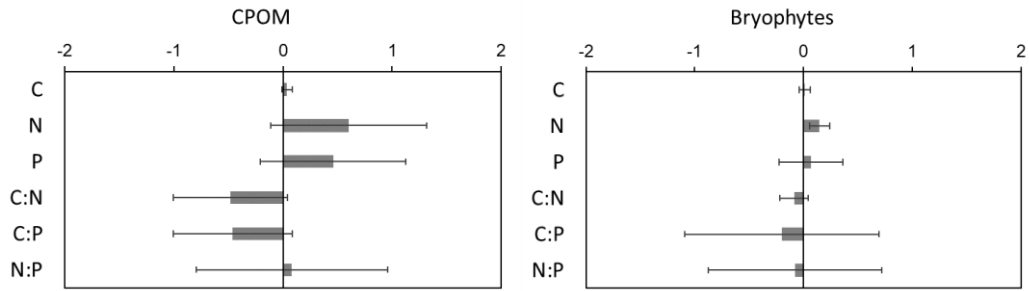

1246

1247 **Fig. 7.** Proportional changes in C, N, P (% w/w) and molar C:N:P stoichiometric ratios in the basal  
1248 food web resources due to sucrose addition based on the before and after control impact experimental  
1249 design. Error bars represent sem.

1250



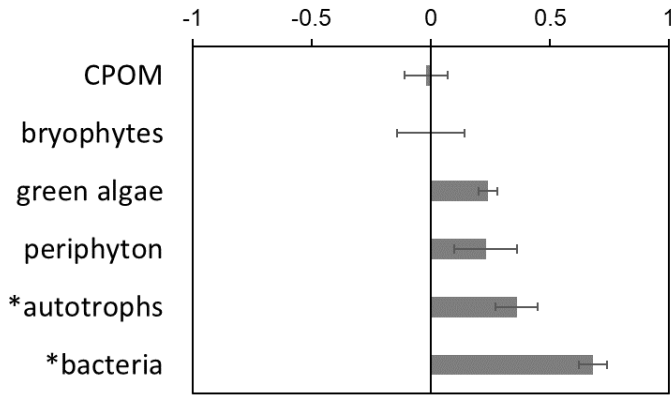

1251

1252 **Fig. 8.** Proportion of carbon derived from added sucrose in food web basal resources based on  $\delta^{13}\text{C}$   
1253 (see TABLE S1) and PLFA  $\delta^{13}\text{C}$  for autotrophs and bacteria in periphyton (indicated by \*, See TABLE  
1254 S2). Error bars represent se. Size effect calculated from BACI design, except for periphyton  
1255 autotrophs and bacteria (periphyton collected at the end of the experiment in the control and treatment  
1256 reach, see method).

1257

1258

1259

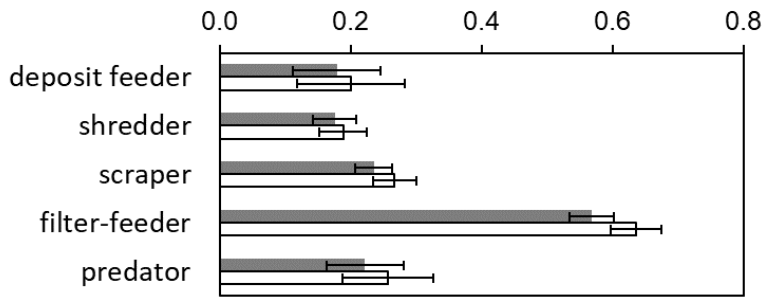

1260

1261 **Fig. 9.** Proportion of carbon derived from added sucrose in macroinvertebrate consumers by  
1262 functional feeding groups based on the before and after control impact experimental design and  
1263 associated  $\delta^{13}\text{C}$  changes (see TABLE S5); observed (grey bars) and at equilibrium (open bars, see  
1264 method); error bars represent the standard error.

1265

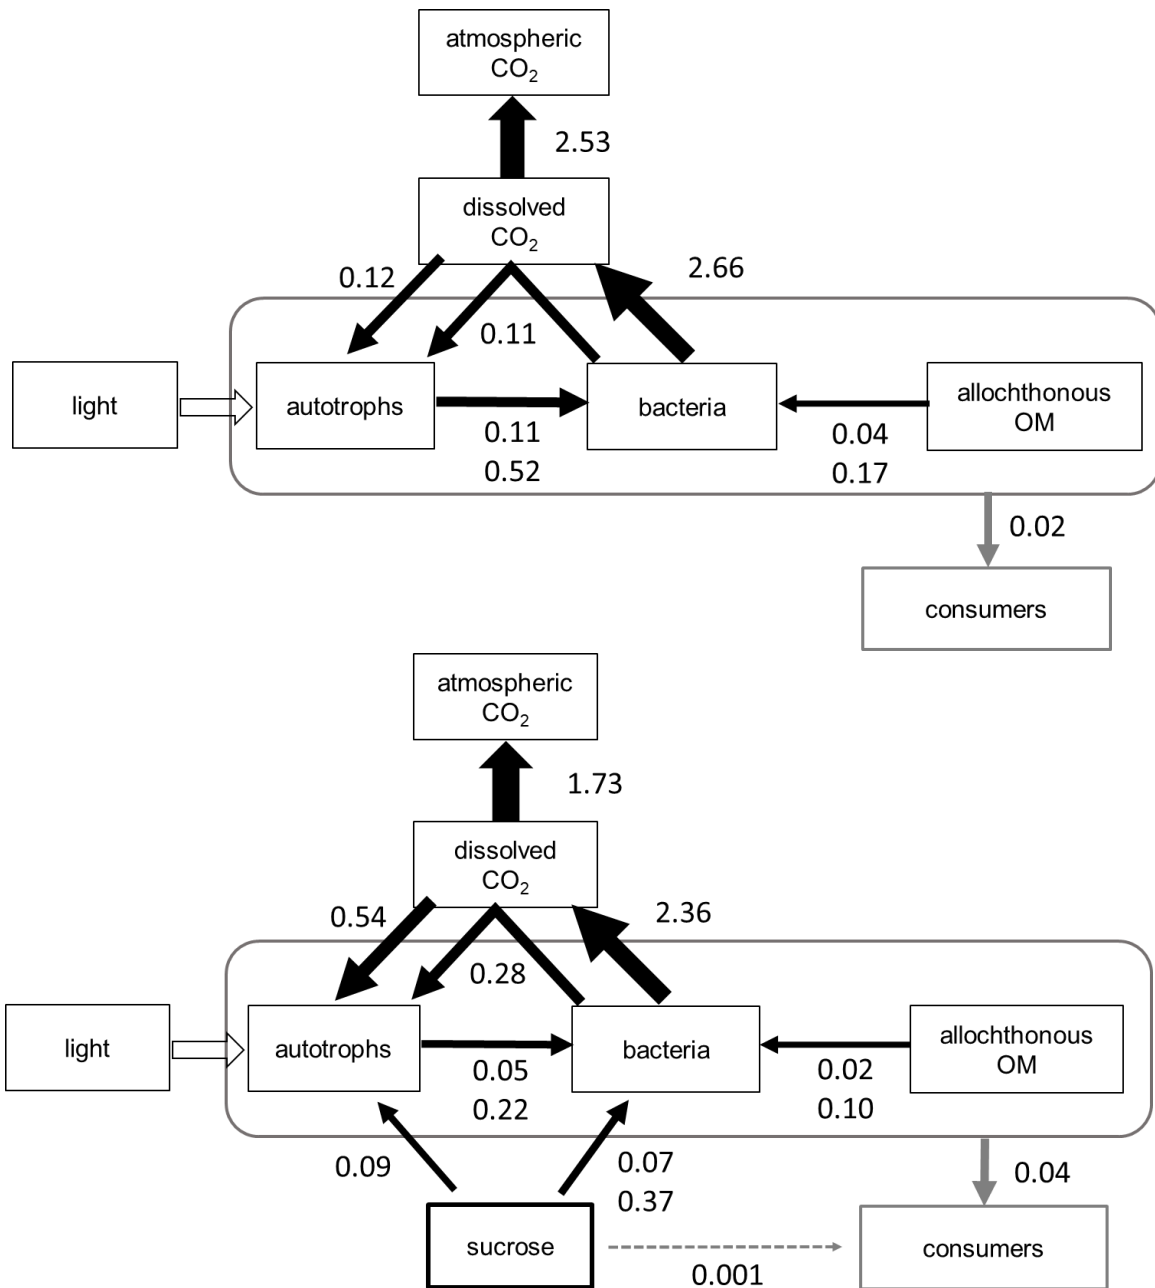

1266

1267

1268

1269 **Fig. 10. Flow food webs under low flows when stream water hydrologically disconnected from**  
 1270 **soils:** in-stream biotic carbon fluxes ( $\text{g C m}^{-2} \text{ day}^{-1}$ , black and grey arrows) and energy flow (light) in  
 1271 the control (top) and treatment reach (bottom) after three weeks of sucrose addition, based on source  
 1272 partitioning using stable isotopes and production estimates. Autotrophs represent net primary  
 1273 production, bacteria represent heterotrophic production, and consumers represent secondary  
 1274 production. Bacterial respiration and net ecosystem production (biotic  $\text{CO}_2$  emissions) are also  
 1275 represented. Two figures were given for bacterial production based on heterotrophic growth  
 1276 efficiencies (HGE) of 0.05 (low) and 0.2 (moderate). Note:  $\text{CO}_2$  emissions to the atmosphere  
 1277 represented 26% and 12% of total  $\text{CO}_2$  emissions, in the control and treatment respectively with most  
 1278  $\text{CO}_2$  derived from soil water and groundwater.

1279

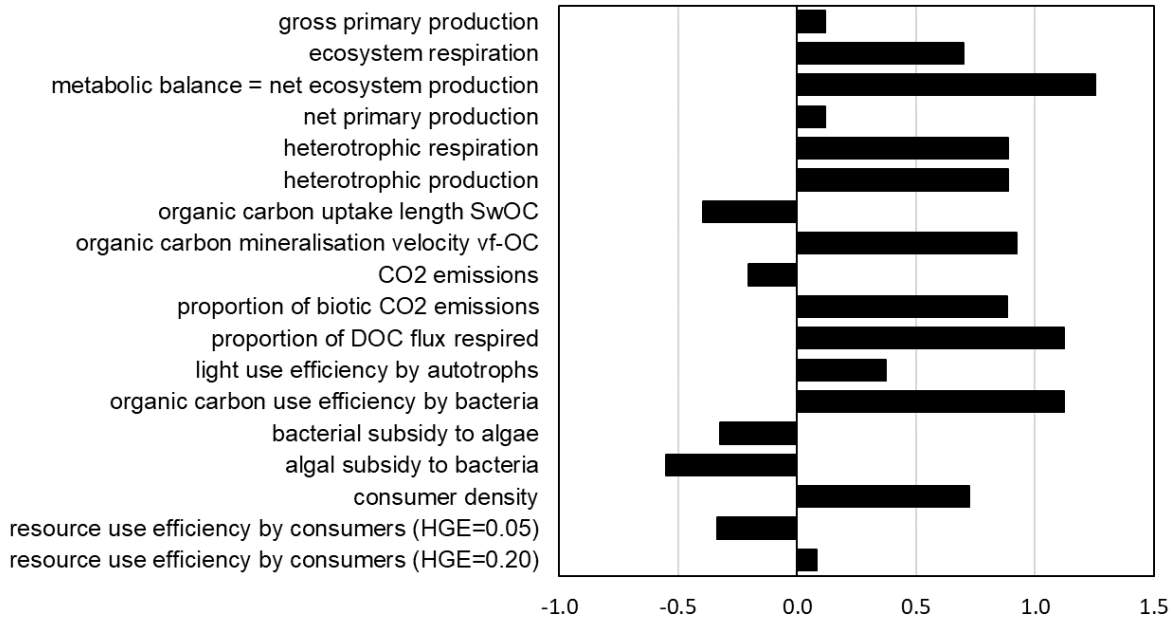

1280

1281

1282 **Fig. 11.** Effect size (1=100%) of sucrose addition on selected ecosystem properties at reach scale  
1283 based on the before and after control impact experimental design, except for resource use efficiency  
1284 by consumers and algae-bacteria reciprocal subsidies relying on a simple comparison between the  
1285 control and the treatment reach. See Table S6 for uncertainties (most very large) and Table S7 for the  
1286 individual values. The resource use efficiency by consumers was estimated for two heterotrophic  
1287 growth efficiency (HGE).

1288
